# Supplementary material for: Ground and excited states analysis of alkali metal ethylenediamine and crown ether complexes
Source: Royal Society of Chemistry journal article supplement (doi:10.1039/d1cp02552j), 2021-01-01
Supplement: d1cp02552j1.pdf [file d1cp02552j1.pdf]

# Electronic Supplementary Information

## Ground and excited states analysis of alkali metal ethylenediamine and crown ether complexes

*Isuru R. Ariyaratna<sup>†</sup> and Evangelos Miliordos\**

Department of Chemistry and Biochemistry, Auburn University, Auburn, AL 36849-5312, USA

<sup>†</sup>Current address: Department of Chemical Engineering, Massachusetts Institute of Technology, Cambridge, Massachusetts 02139, USA

**Corresponding Author**

\*E-mail: [emiliord@auburn.edu](mailto:emiliord@auburn.edu)

**Table S1.** MP2 optimized geometries (Cartesian coordinates in Å) for M(en)<sub>2</sub> (M = Li, Na, K).

| Li(en) <sub>2</sub> |           |           |           | Na(en) <sub>2</sub> |           |           |           | K(en) <sub>2</sub> |           |           |           |
|---------------------|-----------|-----------|-----------|---------------------|-----------|-----------|-----------|--------------------|-----------|-----------|-----------|
| Li                  | 0.000000  | 0.000000  | 0.000000  | Na                  | 0.000000  | 0.000000  | 0.000000  | K                  | 0.000000  | 0.000000  | 0.000000  |
| N                   | 1.522049  | 0.979754  | 1.026989  | N                   | 2.035803  | 0.997381  | 1.077960  | N                  | 2.641318  | 1.359931  | -0.612682 |
| N                   | -1.522049 | 0.979754  | -1.026989 | N                   | -2.035803 | 0.997381  | -1.077960 | N                  | -2.641318 | -1.359931 | -0.612682 |
| N                   | 1.522049  | -0.979754 | -1.026989 | N                   | 2.035803  | -0.997381 | -1.077960 | N                  | 2.641318  | -1.359931 | 0.612682  |
| N                   | -1.522049 | -0.979754 | 1.026989  | N                   | -2.035803 | -0.997381 | 1.077960  | N                  | -2.641318 | 1.359931  | 0.612682  |
| C                   | 2.746271  | 0.717790  | 0.247246  | C                   | 3.214612  | 0.720110  | 0.241848  | C                  | 3.791043  | 0.445632  | -0.614275 |
| C                   | 2.746271  | -0.717790 | -0.247246 | C                   | 3.214612  | -0.720110 | -0.241848 | C                  | 3.791043  | -0.445632 | 0.614275  |
| C                   | -2.746271 | -0.717790 | 0.247246  | C                   | -3.214612 | -0.720110 | 0.241848  | C                  | -3.791043 | 0.445632  | 0.614275  |
| C                   | -2.746271 | 0.717790  | -0.247246 | C                   | -3.214612 | 0.720110  | -0.241848 | C                  | -3.791043 | -0.445632 | -0.614275 |
| H                   | 1.617568  | -0.578909 | -1.956966 | H                   | 2.153229  | -0.561085 | -1.988570 | H                  | 2.772711  | -2.067301 | -0.103345 |
| H                   | 1.406700  | -1.979572 | -1.172947 | H                   | 1.964886  | -1.994609 | -1.260758 | H                  | 2.599898  | -1.865850 | 1.490996  |
| H                   | 1.617568  | 0.578909  | 1.956966  | H                   | 2.153229  | 0.561085  | 1.988570  | H                  | 2.772711  | 2.067301  | 0.103345  |
| H                   | 1.406700  | 1.979572  | 1.172947  | H                   | 1.964886  | 1.994609  | 1.260758  | H                  | 2.599898  | 1.865850  | -1.490996 |
| H                   | -1.617568 | -0.578909 | 1.956966  | H                   | -2.153229 | -0.561085 | 1.988570  | H                  | -2.772711 | 2.067301  | -0.103345 |
| H                   | -1.406700 | -1.979572 | 1.172947  | H                   | -1.964886 | -1.994609 | 1.260758  | H                  | -2.599898 | 1.865850  | 1.490996  |
| H                   | -1.406700 | 1.979572  | -1.172947 | H                   | -1.964886 | 1.994609  | -1.260758 | H                  | -2.599898 | -1.865850 | -1.490996 |
| H                   | -1.617568 | 0.578909  | -1.956966 | H                   | -2.153229 | 0.561085  | -1.988570 | H                  | -2.772711 | -2.067301 | 0.103345  |
| H                   | 3.660386  | 0.907534  | 0.815964  | H                   | 4.157587  | 0.914800  | 0.760628  | H                  | 4.752175  | 0.967089  | -0.660666 |
| H                   | 3.660386  | -0.907534 | -0.815964 | H                   | 4.157587  | -0.914800 | -0.760628 | H                  | 4.752175  | -0.967089 | 0.660666  |
| H                   | 2.747225  | -1.393751 | 0.607718  | H                   | 3.177537  | -1.386800 | 0.620182  | H                  | 3.722833  | 0.179051  | 1.506130  |
| H                   | 2.747225  | 1.393751  | -0.607718 | H                   | 3.177537  | 1.386800  | -0.620182 | H                  | 3.722833  | -0.179051 | -1.506130 |
| H                   | -2.747225 | -1.393751 | -0.607718 | H                   | -3.177537 | -1.386800 | -0.620182 | H                  | -3.722833 | -0.179051 | 1.506130  |
| H                   | -2.747225 | 1.393751  | 0.607718  | H                   | -3.177537 | 1.386800  | 0.620182  | H                  | -3.722833 | 0.179051  | -1.506130 |
| H                   | -3.660386 | -0.907534 | 0.815964  | H                   | -4.157587 | -0.914800 | 0.760628  | H                  | -4.752175 | -0.967089 | 0.660666  |
| H                   | -2.747225 | 1.393751  | 0.607718  | H                   | -3.177537 | 1.386800  | 0.620182  | H                  | -3.722833 | 0.179051  | -1.506130 |
| H                   | -3.660386 | 0.907534  | -0.815964 | H                   | -4.157587 | 0.914800  | -0.760628 | H                  | -4.752175 | -0.967089 | -0.660666 |

**Table S2.** MP2 optimized geometries (Cartesian coordinates in Å) for M(12C4) (M = Li, Na, K).

| Li(12C4) |           |           |           | Na(12C4) |           |           |           | K(12C4) |           |           |           |
|----------|-----------|-----------|-----------|----------|-----------|-----------|-----------|---------|-----------|-----------|-----------|
| O        | 0.000000  | 1.997913  | 0.439899  | O        | 0.000000  | 1.586063  | 0.181225  | O       | 0.000000  | 1.728866  | -0.042266 |
| O        | -1.565783 | 0.000000  | -0.272763 | O        | -2.152444 | 0.000000  | -0.796518 | O       | -1.996526 | 0.000000  | -1.054735 |
| O        | 1.565783  | -0.000000 | -0.272763 | O        | 2.152444  | -0.000000 | -0.796518 | O       | 1.996526  | -0.000000 | -1.054735 |
| O        | -0.000000 | -1.997913 | 0.439899  | O        | -0.000000 | -1.586063 | 0.181225  | O       | -0.000000 | -1.728866 | -0.042266 |
| C        | 1.210220  | 2.297931  | -0.249624 | C        | 1.184019  | 2.130406  | -0.384724 | C       | 1.188865  | 2.186697  | -0.665987 |
| C        | -2.209114 | 1.214755  | 0.100389  | C        | -2.336150 | 1.206212  | -0.079464 | C       | -2.292140 | 1.201912  | -0.372782 |
| C        | 2.209114  | 1.214755  | 0.100389  | C        | 2.336150  | 1.206212  | -0.079464 | C       | 2.292140  | 1.201912  | -0.372782 |
| C        | -2.209114 | -1.214755 | 0.100389  | C        | -2.336150 | -1.206212 | -0.079464 | C       | -2.292140 | -1.201912 | -0.372782 |
| C        | 2.209114  | -1.214755 | 0.100389  | C        | 2.336150  | -1.206212 | -0.079464 | C       | 2.292140  | -1.201912 | -0.372782 |
| C        | -1.210220 | -2.297931 | -0.249624 | C        | -1.184019 | -2.130406 | -0.384724 | C       | -1.188865 | -2.186697 | -0.665987 |
| C        | 1.210220  | -2.297931 | -0.249624 | C        | 1.184019  | -2.130406 | -0.384724 | C       | 1.188865  | -2.186697 | -0.665987 |
| C        | -1.210220 | 2.297931  | -0.249624 | C        | -1.184019 | 2.130406  | -0.384724 | C       | -1.188865 | 2.186697  | -0.665987 |
| H        | 1.587940  | 3.279489  | 0.043989  | H        | 1.383114  | 3.128357  | 0.020431  | H       | 1.463814  | 3.182421  | -0.301920 |
| H        | 1.031769  | 2.287034  | -1.327584 | H        | 1.069074  | 2.205570  | -1.469612 | H       | 1.044694  | 2.235447  | -1.748996 |
| H        | -2.422657 | 1.214429  | 1.173735  | H        | -2.388507 | 1.020303  | 0.997451  | H       | -2.358710 | 1.033115  | 0.706273  |
| H        | -3.139158 | 1.357374  | -0.457745 | H        | -3.271937 | 1.687478  | -0.378557 | H       | -3.250160 | 1.615100  | -0.703834 |
| H        | 3.139158  | 1.357374  | -0.457745 | H        | 3.271937  | 1.687478  | -0.378557 | H       | 3.250160  | 1.615100  | -0.703834 |
| H        | 2.422657  | 1.214429  | -1.173735 | H        | 2.388507  | 1.020303  | 0.997451  | H       | 2.358710  | 1.033115  | 0.706273  |
| H        | -3.139158 | -1.357374 | -0.457745 | H        | -3.271937 | -1.687478 | -0.378557 | H       | -3.250160 | -1.615100 | -0.703834 |
| H        | -2.422657 | -1.214429 | 1.173735  | H        | -2.388507 | -1.020303 | 0.997451  | H       | -2.358710 | -1.033115 | 0.706273  |
| H        | 2.422657  | -1.214429 | 1.173735  | H        | 2.388507  | -1.020303 | 0.997451  | H       | 2.358710  | -1.033115 | 0.706273  |
| H        | 3.139158  | -1.357374 | -0.457745 | H        | 3.271937  | -1.687478 | -0.378557 | H       | 3.250160  | -1.615100 | -0.703834 |
| H        | -1.587940 | -3.279489 | 0.043989  | H        | -1.383114 | -3.128357 | 0.020431  | H       | -1.463814 | -3.182421 | -0.301920 |
| H        | -1.031769 | -2.287034 | -1.327584 | H        | -1.069074 | -2.205570 | -1.469612 | H       | -1.044694 | -2.235447 | -1.748996 |
| H        | 1.031769  | 2.287034  | -1.327584 | H        | 1.069074  | 2.205570  | -1.469612 | H       | 1.044694  | 2.235447  | -1.748996 |
| H        | 1.587940  | 3.279489  | 0.043989  | H        | 1.383114  | 3.128357  | 0.020431  | H       | 1.463814  | 3.182421  | -0.301920 |
| H        | -1.587940 | 3.279489  | 0.043989  | H        | -1.383114 | 3.128357  | 0.020431  | H       | -1.463814 | 3.182421  | -0.301920 |
| H        | -1.031769 | 2.287034  | -1.327584 | H        | -1.069074 | 2.205570  | -1.469612 | H       | -1.044694 | 2.235447  | -1.748996 |
| H        | 1.031769  | -2.287034 | -1.327584 | H        | 1.069074  | -2.205570 | -1.469612 | H       | 1.044694  | -2.235447 | -1.748996 |
| Li       | 0.000000  | 0.000000  | 1.059294  | Na       | 0.000000  | 0.000000  | 2.209668  | K       | 0.000000  | 0.000000  | 2.667177  |

**Table S3.** MP2 optimized geometries (Cartesian coordinates in Å) for M(15C5) (M = Li, Na, K).

| Li(15C5) |           |           |           | Na(15C5) |           |           |           | K(15C5) |           |           |           |
|----------|-----------|-----------|-----------|----------|-----------|-----------|-----------|---------|-----------|-----------|-----------|
| O        | 2.127232  | 0.700992  | -0.240642 | O        | 0.001394  | -2.009339 | -0.403170 | O       | -0.014057 | -1.969988 | -0.565176 |
| O        | 1.285257  | -1.734291 | 0.130862  | O        | -2.311861 | -0.756453 | 0.309156  | O       | -2.406580 | -0.756362 | 0.123804  |
| O        | 0.001234  | 2.068350  | 0.000021  | O        | 2.325318  | -0.787753 | 0.564277  | O       | 2.405973  | -0.813556 | 0.381205  |
| O        | -1.287563 | -1.732995 | -0.131258 | O        | -1.348284 | 1.693365  | -0.343261 | O       | -1.328969 | 1.689036  | -0.504624 |
| O        | -2.126387 | 0.703517  | 0.240813  | O        | 1.375359  | 1.807353  | 0.116754  | O       | 1.437576  | 1.838452  | -0.035908 |
| C        | 0.695469  | -2.963115 | -0.279873 | C        | -3.182705 | 0.240791  | -0.202651 | C       | -3.203199 | 0.277909  | -0.429172 |
| C        | 1.191858  | 2.844292  | -0.075812 | C        | 2.339116  | -1.741615 | -0.488152 | C       | 2.330470  | -1.755937 | -0.677519 |
| C        | -0.699045 | -2.962277 | 0.279849  | C        | -2.647284 | 1.584284  | 0.221322  | C       | -2.642841 | 1.604914  | 0.014348  |
| C        | 3.095131  | -0.258115 | 0.167052  | C        | -1.140456 | -2.779674 | -0.045987 | C       | -1.165768 | -2.743737 | -0.268735 |
| C        | 2.614618  | -1.583791 | -0.352006 | C        | -2.355571 | -1.970774 | -0.418702 | C       | -2.371846 | -1.931964 | -0.662320 |
| C        | -1.188515 | 2.845685  | 0.075735  | C        | 3.195286  | 0.319019  | 0.354102  | C       | 3.243186  | 0.297977  | 0.092833  |
| C        | -2.616494 | -1.580657 | 0.352188  | C        | -0.704181 | 2.923322  | -0.052510 | C       | -0.679485 | 2.909842  | -0.206449 |
| C        | -2.312117 | 1.958058  | -0.395030 | C        | 2.567364  | 1.380994  | -0.521060 | C       | 2.557088  | 1.349561  | -0.748937 |
| C        | -3.095452 | -0.254421 | -0.166835 | C        | 0.690223  | 2.816862  | -0.612146 | C       | 0.713774  | 2.813719  | -0.769150 |
| C        | 2.314513  | 1.955432  | 0.394942  | C        | 1.221001  | -2.715987 | -0.225805 | C       | 1.190314  | -2.696035 | -0.393708 |
| H        | 3.283678  | 2.389300  | 0.128897  | H        | 1.280745  | -3.554713 | -0.927425 | H       | 1.230195  | -3.542305 | -0.190575 |
| H        | 1.264871  | -3.811622 | 0.109767  | H        | -4.200226 | 0.099676  | 0.173700  | H       | -4.245161 | 0.181678  | -0.107957 |
| H        | 0.674215  | -3.015062 | -1.371662 | H        | -3.197084 | 0.190930  | -1.295700 | H       | -3.163514 | 0.231851  | -1.521987 |
| H        | 1.122084  | 3.722988  | 0.570912  | H        | 3.300307  | -2.264953 | -0.506968 | H       | 3.269334  | -2.316948 | -0.747093 |
| H        | 1.344392  | 3.166489  | -1.108453 | H        | 2.176059  | -1.262232 | -1.457751 | H       | 2.141248  | -1.260731 | -1.634574 |
| H        | -1.269329 | -3.810349 | -0.109448 | H        | -3.303014 | 2.378346  | -0.152584 | H       | -3.271971 | 2.413531  | -0.375656 |
| H        | -0.677767 | -3.013889 | 1.371659  | H        | -2.595657 | 1.652932  | 1.312987  | H       | -2.636134 | 1.676967  | 1.107988  |
| H        | 3.155429  | -0.280034 | 1.258805  | H        | -1.131505 | -2.990948 | 1.027959  | H       | -1.198322 | -2.995515 | 0.797021  |
| H        | 4.079444  | -0.012780 | -0.242602 | H        | -1.151393 | -3.727962 | -0.593886 | H       | -1.161678 | -3.677788 | -0.841969 |
| H        | 2.615369  | -1.597877 | -1.445244 | H        | -2.331715 | -1.758334 | -1.492237 | H       | -2.283251 | -1.666460 | -1.721326 |
| H        | 3.251356  | -2.392430 | 0.017859  | H        | -3.264776 | -2.535767 | -0.188847 | H       | -3.280361 | -2.529160 | -0.520905 |
| H        | -1.117671 | 3.724248  | -0.571045 | H        | 4.143339  | -0.011999 | -0.080667 | H       | 4.159848  | -0.029289 | -0.408933 |
| H        | -1.340716 | 3.168122  | 1.108347  | H        | 3.385326  | 0.735390  | 1.341736  | H       | 3.512380  | 0.729301  | 1.056151  |
| H        | -2.616779 | -1.594547 | 1.445434  | H        | -0.666065 | 3.092036  | 1.028690  | H       | -0.642810 | 3.081080  | 0.875462  |
| H        | -3.254477 | -2.388508 | -0.017235 | H        | -1.232833 | 3.759354  | -0.523364 | H       | -1.204057 | 3.753605  | -0.669592 |
| H        | -3.280811 | 2.393113  | -0.129241 | H        | 3.269033  | 2.215532  | -0.632733 | H       | 3.273282  | 2.155331  | -0.953869 |
| H        | -2.266681 | 1.827569  | -1.480424 | H        | 2.334395  | 0.994781  | -1.519718 | H       | 2.229160  | 0.935399  | -1.709439 |
| H        | -3.155836 | -0.276294 | -1.258583 | H        | 0.634124  | 2.539337  | -1.669723 | H       | 0.644309  | 2.515130  | -1.820617 |
| H        | -4.079452 | -0.007909 | 0.242849  | H        | 1.214044  | 3.773348  | -0.521522 | H       | 1.215182  | 3.785474  | -0.709474 |
| H        | 2.269113  | 1.825175  | 1.480367  | H        | 1.296847  | -3.099688 | 0.796297  | H       | 1.271731  | -3.083480 | 0.628647  |
| Li       | 0.000529  | -0.022280 | -0.000200 | Na       | -0.017466 | -0.013252 | 1.443750  | K       | -0.023216 | -0.053465 | 2.077218  |

**Table S4.** MP2 optimized geometries (Cartesian coordinates in Å) for M(18C6) (M = Na, K).

| Na(18C6) |           |           |           | K(18C6) |           |           |           |
|----------|-----------|-----------|-----------|---------|-----------|-----------|-----------|
| H        | 3.272757  | 3.231538  | -0.039937 | H       | 1.224135  | 4.484185  | -0.255390 |
| O        | 2.378722  | 1.373356  | 0.102067  | O       | 0.000000  | 2.847985  | 0.073059  |
| O        | 0.000000  | 2.771608  | -0.259424 | O       | 2.394820  | 1.382650  | -0.359252 |
| O        | 2.400283  | -1.385804 | -0.259424 | O       | -2.394820 | 1.382650  | -0.359252 |
| O        | -2.378722 | 1.373356  | 0.102067  | O       | 2.466427  | -1.423992 | 0.073059  |
| O        | -0.000000 | -2.746711 | 0.102067  | O       | -2.466427 | -1.423992 | 0.073059  |
| O        | -2.400283 | -1.385804 | -0.259424 | O       | -0.000000 | -2.765299 | -0.359252 |
| C        | 3.528927  | 0.687819  | -0.353743 | C       | -1.173210 | 3.412351  | -0.483414 |
| C        | -1.166931 | 3.395428  | 0.248468  | C       | 3.545945  | 0.693993  | 0.103896  |
| C        | 2.357062  | -2.708306 | 0.248468  | C       | -3.545945 | 0.693993  | 0.103896  |
| C        | -2.360132 | 2.712231  | -0.353743 | C       | 3.541788  | -0.690146 | -0.483414 |
| C        | 1.168795  | -3.400049 | -0.353743 | C       | -3.541788 | -0.690146 | -0.483414 |
| C        | 1.166931  | 3.395428  | 0.248468  | C       | 2.373988  | 2.723882  | 0.103896  |
| C        | 3.523993  | -0.687123 | 0.248468  | C       | -2.373988 | 2.723882  | 0.103896  |
| C        | -3.528927 | 0.687819  | -0.353743 | C       | 2.368577  | -2.722205 | -0.483414 |
| C        | -1.168795 | -3.400049 | -0.353743 | C       | -2.368577 | -2.722205 | -0.483414 |
| C        | -3.523993 | -0.687123 | 0.248468  | C       | 1.171957  | -3.417875 | 0.103896  |
| C        | -2.357062 | -2.708306 | 0.248468  | C       | -1.171957 | -3.417875 | 0.103896  |
| C        | 2.360132  | 2.712231  | -0.353743 | C       | 1.173210  | 3.412351  | -0.483414 |
| H        | 3.522433  | 0.620918  | -1.447233 | H       | -1.173900 | 3.282552  | -1.571833 |
| H        | 4.434972  | 1.218522  | -0.039937 | H       | -1.224135 | 4.484185  | -0.255390 |
| H        | -1.198425 | 3.306864  | 1.339039  | H       | 3.547678  | 0.638568  | 1.197772  |
| H        | -1.177031 | 4.457457  | -0.023103 | H       | 4.454256  | 1.216432  | -0.218784 |
| H        | 3.271756  | -3.248067 | -0.023103 | H       | -4.454256 | 1.216432  | -0.218784 |
| H        | 2.264616  | -2.691299 | 1.339039  | H       | -3.547678 | 0.638568  | 1.197772  |
| H        | -2.298947 | 2.740057  | -1.447233 | H       | 3.429723  | -0.624649 | -1.571833 |
| H        | -3.272757 | 3.231538  | -0.039937 | H       | 4.495485  | -1.181961 | -0.255390 |
| H        | 1.162215  | -4.450059 | -0.039937 | H       | -4.495485 | -1.181961 | -0.255390 |
| H        | 1.223485  | -3.360975 | -1.447233 | H       | -3.429723 | -0.624649 | -1.571833 |
| H        | 1.177031  | 4.457457  | -0.023103 | H       | 3.280589  | 3.249283  | -0.218784 |
| H        | 1.198425  | 3.306864  | 1.339039  | H       | 2.326856  | 2.753095  | 1.197772  |
| H        | 3.463041  | -0.615566 | 1.339039  | H       | -2.326856 | 2.753095  | 1.197772  |
| H        | 4.448786  | -1.209390 | -0.023103 | H       | -3.280589 | 3.249283  | -0.218784 |
| H        | -4.434972 | 1.218522  | -0.039937 | H       | 3.271351  | -3.302224 | -0.255390 |
| H        | -3.522433 | 0.620918  | -1.447233 | H       | 2.255824  | -2.657903 | -1.571833 |
| H        | -1.223485 | -3.360975 | -1.447233 | H       | -2.255824 | -2.657903 | -1.571833 |
| H        | -1.162215 | -4.450059 | -0.039937 | H       | -3.271351 | -3.302224 | -0.255390 |
| H        | -4.448786 | -1.209390 | -0.023103 | H       | 1.173667  | -4.465715 | -0.218784 |
| H        | -3.463041 | -0.615566 | 1.339039  | H       | 1.220823  | -3.391664 | 1.197772  |
| H        | -3.271756 | -3.248067 | -0.023103 | H       | -1.173667 | -4.465715 | -0.218784 |
| H        | -2.264616 | -2.691299 | 1.339039  | H       | -1.220823 | -3.391664 | 1.197772  |
| H        | 2.298947  | 2.740057  | -1.447233 | H       | 1.173900  | 3.282552  | -1.571833 |
| Na       | 0.000000  | 0.000000  | 0.781258  | K       | 0.000000  | 0.000000  | 1.348457  |

**Table S5.** B3LYP optimized geometries (Cartesian coordinates in Å) for M(en)<sub>2</sub> (M = Li, Na, K).

| Li(en) <sub>2</sub> |           |           |           | Na(en) <sub>2</sub> |           |           |           | K(en) <sub>2</sub> |           |           |           |
|---------------------|-----------|-----------|-----------|---------------------|-----------|-----------|-----------|--------------------|-----------|-----------|-----------|
| Li                  | 0.000000  | 0.000000  | 0.000000  | Na                  | 0.000000  | 0.000000  | 0.000000  | K                  | 0.000000  | 0.000000  | 0.000000  |
| N                   | 1.506043  | 0.999597  | 1.026116  | N                   | 1.967008  | 1.025863  | 1.077560  | N                  | 2.487401  | 0.989236  | 1.133371  |
| N                   | -1.506043 | 0.999597  | -1.026116 | N                   | -1.967008 | 1.025863  | -1.077560 | N                  | -2.487401 | 0.989236  | -1.133371 |
| N                   | 1.506043  | -0.999597 | -1.026116 | N                   | 1.967008  | -1.025863 | -1.077560 | N                  | 2.487401  | -0.989236 | -1.133371 |
| N                   | -1.506043 | -0.999597 | 1.026116  | N                   | -1.967008 | -1.025863 | 1.077560  | N                  | -2.487401 | -0.989236 | 1.133371  |
| C                   | 2.738171  | 0.717105  | 0.257741  | C                   | 3.148879  | 0.721767  | 0.246986  | C                  | 3.645183  | 0.714848  | 0.265803  |
| C                   | 2.738171  | -0.717105 | -0.257741 | C                   | 3.148879  | -0.721767 | -0.246986 | C                  | 3.645183  | -0.714848 | -0.265803 |
| C                   | -2.738171 | -0.717105 | 0.257741  | C                   | -3.148879 | -0.721767 | 0.246986  | C                  | -3.645183 | -0.714848 | 0.265803  |
| C                   | -2.738171 | 0.717105  | -0.257741 | C                   | -3.148879 | 0.721767  | -0.246986 | C                  | -3.645183 | 0.714848  | -0.265803 |
| H                   | 1.585634  | -0.623675 | -1.968708 | H                   | 2.075369  | -0.621588 | -2.004737 | H                  | 2.597362  | -0.518232 | -2.027229 |
| H                   | 1.378690  | -2.003494 | -1.137652 | H                   | 1.883662  | -2.029879 | -1.220145 | H                  | 2.429244  | -1.981398 | -1.344069 |
| H                   | 1.585634  | 0.623675  | 1.968708  | H                   | 2.075369  | 0.621588  | 2.004737  | H                  | 2.597362  | 0.518232  | 2.027229  |
| H                   | 1.378690  | 2.003494  | 1.137652  | H                   | 1.883662  | 2.029879  | 1.220145  | H                  | 2.429244  | 1.981398  | 1.344069  |
| H                   | -1.585634 | -0.623675 | 1.968708  | H                   | -2.075369 | -0.621588 | 2.004737  | H                  | -2.597362 | -0.518232 | 2.027229  |
| H                   | -1.378690 | -2.003494 | 1.137652  | H                   | -1.883662 | -2.029879 | 1.220145  | H                  | -2.429244 | -1.981398 | 1.344069  |
| H                   | -1.585634 | 0.623675  | -1.968708 | H                   | -2.075369 | 0.621588  | -2.004737 | H                  | -2.597362 | 0.518232  | -2.027229 |
| H                   | -1.378690 | 2.003494  | -1.137652 | H                   | -1.883662 | 2.029879  | -1.220145 | H                  | -2.429244 | 1.981398  | -1.344069 |
| H                   | 3.647019  | 0.889474  | 0.844215  | H                   | 4.090291  | 0.903957  | 0.777616  | H                  | 4.602767  | 0.889207  | 0.771423  |
| H                   | 3.647019  | -0.889474 | -0.844215 | H                   | 4.090291  | -0.903957 | -0.777616 | H                  | 4.602767  | -0.889207 | -0.771423 |
| H                   | 2.765897  | -1.406572 | 0.587200  | H                   | 3.133964  | -1.395761 | 0.611220  | H                  | 3.603473  | -1.410074 | 0.575266  |
| H                   | 2.765897  | 1.406572  | -0.587200 | H                   | 3.133964  | 1.395761  | -0.611220 | H                  | 3.603473  | 1.410074  | -0.575266 |
| H                   | -2.765897 | -1.406572 | -0.587200 | H                   | -3.133964 | -1.395761 | -0.611220 | H                  | -3.603473 | -1.410074 | -0.575266 |
| H                   | -2.765897 | 1.406572  | 0.587200  | H                   | -3.133964 | 1.395761  | 0.611220  | H                  | -3.603473 | 1.410074  | 0.575266  |
| H                   | -3.647019 | -0.889474 | 0.844215  | H                   | -4.090291 | -0.903957 | 0.777616  | H                  | -4.602767 | -0.889207 | 0.771423  |
| H                   | -3.647019 | 0.889474  | -0.844215 | H                   | -4.090291 | 0.903957  | -0.777616 | H                  | -4.602767 | 0.889207  | -0.771423 |

**Table S6.** B3LYP optimized geometries (Cartesian coordinates in Å) for M(12C4) (M = Li, Na, K).

| Li(12C4) |           |           |           | Na(12C4) |           |           |           | K(12C4) |           |           |           |
|----------|-----------|-----------|-----------|----------|-----------|-----------|-----------|---------|-----------|-----------|-----------|
| O        | 0.000000  | 1.971267  | 0.440001  | O        | 0.000000  | 1.602371  | 0.175886  | O       | 0.000000  | 1.715542  | -0.005944 |
| O        | -1.616245 | 0.000000  | -0.273953 | O        | -2.223954 | 0.000000  | -0.779035 | O       | -2.088820 | 0.000000  | -1.006851 |
| O        | 1.616245  | -0.000000 | -0.273953 | O        | 2.223954  | -0.000000 | -0.779035 | O       | 2.088820  | -0.000000 | -1.006851 |
| O        | -0.000000 | -1.971267 | 0.440001  | O        | -0.000000 | -1.602371 | 0.175886  | O       | -0.000000 | -1.715542 | -0.005944 |
| C        | 1.226127  | 2.317584  | -0.215327 | C        | 1.195947  | 2.134894  | -0.380317 | C       | 1.199138  | 2.183466  | -0.610009 |
| C        | -2.246987 | 1.230635  | 0.082880  | C        | -2.358597 | 1.217546  | -0.065917 | C       | -2.326123 | 1.214841  | -0.319948 |
| C        | 2.246987  | -1.230635 | 0.082880  | C        | 2.358597  | -1.217546 | -0.065917 | C       | 2.326123  | -1.214841 | -0.319948 |
| C        | -2.246987 | 1.230635  | 0.082880  | C        | -2.358597 | 1.217546  | -0.065917 | C       | -2.326123 | 1.214841  | -0.319948 |
| C        | 2.246987  | -1.230635 | 0.082880  | C        | 2.358597  | -1.217546 | -0.065917 | C       | 2.326123  | -1.214841 | -0.319948 |
| C        | -1.226127 | -2.317584 | -0.215327 | C        | -1.195947 | -2.134894 | -0.380317 | C       | -1.199138 | -2.183466 | -0.610009 |
| C        | 1.226127  | 2.317584  | -0.215327 | C        | 1.195947  | 2.134894  | -0.380317 | C       | 1.199138  | 2.183466  | -0.610009 |
| C        | -1.226127 | 2.317584  | -0.215327 | C        | -1.195947 | 2.134894  | -0.380317 | C       | -1.199138 | 2.183466  | -0.610009 |
| H        | 1.589521  | 3.283936  | 0.145836  | H        | 1.397151  | 3.133366  | 0.027943  | H       | 1.461652  | 3.177649  | -0.227231 |
| H        | 1.059265  | 2.381779  | -1.293027 | H        | 1.089929  | 2.220612  | -1.466441 | H       | 1.064238  | 2.256135  | -1.693476 |
| H        | -2.511476 | 1.222084  | 1.145654  | H        | -2.411226 | 1.038187  | 1.013908  | H       | -2.407457 | 1.046597  | 0.760207  |
| H        | -3.154319 | 1.391247  | -0.512404 | H        | -3.288053 | 1.718004  | -0.360115 | H       | -3.271296 | 1.661898  | -0.650683 |
| H        | 3.154319  | -1.391247 | -0.512404 | H        | 3.288053  | -1.718004 | -0.360115 | H       | 3.271296  | -1.661898 | -0.650683 |
| H        | 2.511476  | 1.222084  | 1.145654  | H        | 2.411226  | 1.038187  | 1.013908  | H       | 2.407457  | 1.046597  | 0.760207  |
| H        | -3.154319 | -1.391247 | -0.512404 | H        | -3.288053 | -1.718004 | -0.360115 | H       | -3.271296 | -1.661898 | -0.650683 |
| H        | -2.511476 | -1.222084 | 1.145654  | H        | -2.411226 | -1.038187 | 1.013908  | H       | -2.407457 | -1.046597 | 0.760207  |
| H        | 2.511476  | -1.222084 | 1.145654  | H        | 2.411226  | -1.038187 | 1.013908  | H       | 2.407457  | -1.046597 | 0.760207  |
| H        | 3.154319  | -1.391247 | -0.512404 | H        | 3.288053  | -1.718004 | -0.360115 | H       | 3.271296  | -1.661898 | -0.650683 |
| H        | -1.589521 | -3.283936 | 0.145836  | H        | -1.397151 | -3.133366 | 0.027943  | H       | -1.461652 | -3.177649 | -0.227231 |
| H        | -1.059265 | -2.381779 | -1.293027 | H        | -1.089929 | -2.220612 | -1.466441 | H       | -1.064238 | -2.256135 | -1.693476 |
| H        | 1.059265  | 2.381779  | -1.293027 | H        | 1.089929  | 2.220612  | -1.466441 | H       | 1.064238  | 2.256135  | -1.693476 |
| H        | 1.589521  | -3.283936 | 0.145836  | H        | 1.397151  | -3.133366 | 0.027943  | H       | 1.461652  | -3.177649 | -0.227231 |
| H        | -1.589521 | 3.283936  | 0.145836  | H        | -1.397151 | 3.133366  | 0.027943  | H       | -1.461652 | 3.177649  | -0.227231 |
| H        | -1.059265 | 2.381779  | -1.293027 | H        | -1.089929 | 2.220612  | -1.466441 | H       | -1.064238 | 2.256135  | -1.693476 |
| Li       | 0.000000  | 0.000000  | 0.859242  | Na       | 0.000000  | 0.000000  | 2.136257  | K       | 0.000000  | 0.000000  | 2.408864  |

**Table S7.** B3LYP optimized geometries (Cartesian coordinates in Å) for M(15C5) (M = Li, Na, K).

| Li(15C5) |           |           |           | Na(15C5) |           |           |           | K(15C5) |           |           |           |
|----------|-----------|-----------|-----------|----------|-----------|-----------|-----------|---------|-----------|-----------|-----------|
| O        | 2.139769  | 0.694433  | -0.218129 | O        | -2.206119 | 0.788214  | 0.375442  | O       | 0.057777  | 2.054807  | -0.498897 |
| O        | 1.298047  | -1.763754 | 0.134924  | O        | -1.435516 | -1.831693 | -0.151011 | O       | 2.394192  | 0.706759  | 0.167110  |
| O        | 0.003242  | 2.100764  | -0.000750 | O        | 0.049856  | 2.137613  | -0.004659 | O       | -2.353748 | 0.858045  | 0.410184  |
| O        | -1.304223 | -1.760661 | -0.136690 | O        | 1.284206  | -1.808138 | 0.233482  | O       | 1.300820  | -1.758285 | -0.436311 |
| O        | -2.137823 | 0.701011  | 0.218221  | O        | 2.326774  | 0.708059  | -0.227816 | O       | -1.474291 | -1.823035 | 0.001277  |
| C        | 0.701099  | -2.994277 | -0.262201 | C        | -0.777095 | -2.966599 | 0.389535  | C       | 3.191073  | -0.336727 | -0.375367 |
| C        | 1.204319  | 2.863950  | -0.120324 | C        | -1.133123 | 2.904434  | 0.175848  | C       | -2.303504 | 1.842829  | -0.613636 |
| C        | -0.710388 | -2.991849 | 0.263010  | C        | 0.631478  | -3.009543 | -0.159687 | C       | 2.626687  | -1.670967 | 0.060925  |
| C        | 3.114595  | -0.262555 | 0.179424  | C        | -3.146698 | -0.179589 | -0.067624 | C       | 1.238207  | 2.773132  | -0.170372 |
| C        | 2.641548  | -1.604610 | -0.313227 | C        | -2.694344 | -1.531814 | 0.435099  | C       | 2.430458  | 1.926379  | -0.556372 |
| C        | -1.195406 | 2.867366  | 0.120605  | C        | 1.283395  | 2.843089  | 0.012969  | C       | -3.242391 | -0.229838 | 0.185037  |
| C        | -2.646450 | -1.596439 | 0.313279  | C        | 2.619637  | -1.660913 | -0.234446 | C       | 0.618894  | -2.969223 | -0.155669 |
| C        | -2.341843 | 1.996314  | -0.335003 | C        | 2.355733  | 1.906662  | 0.532185  | C       | -2.632583 | -1.337502 | -0.655895 |
| C        | -3.115422 | -0.252965 | -0.179369 | C        | 3.138639  | -0.339567 | 0.286764  | C       | -0.782767 | -2.842670 | -0.707820 |
| C        | 2.347912  | 1.989134  | 0.335262  | C        | -2.315524 | 2.057130  | -0.252309 | C       | -1.150913 | 2.778301  | -0.327368 |
| H        | 3.302289  | 2.407546  | -0.008359 | H        | -3.248273 | 2.561066  | 0.034077  | H       | -1.190480 | 3.628059  | -1.020897 |
| H        | 1.257046  | -3.842328 | 0.155596  | H        | -1.304601 | -3.887824 | 0.114200  | H       | 4.229620  | -0.247121 | -0.035639 |
| H        | 0.708353  | -3.072567 | -1.354586 | H        | -0.749305 | -2.895143 | 1.482968  | H       | 3.177667  | -0.281403 | -1.468842 |
| H        | 1.157507  | 3.757708  | 0.509688  | H        | -1.111763 | 3.810344  | -0.440134 | H       | -3.240972 | 2.411201  | -0.631458 |
| H        | 1.327254  | 3.172690  | -1.162840 | H        | -1.219622 | 3.196335  | 1.228009  | H       | -2.157482 | 1.382351  | -1.595941 |
| H        | -1.268578 | -3.839465 | -0.152701 | H        | 1.155997  | -3.883572 | 0.246117  | H       | 3.252027  | -2.476423 | -0.345742 |
| H        | -0.717551 | -3.067670 | 1.355582  | H        | 0.611676  | -3.088203 | -1.253308 | H       | 2.634640  | -1.757251 | 1.155845  |
| H        | 3.205755  | -0.266078 | 1.271016  | H        | -3.195304 | -0.186993 | -1.162948 | H       | 1.257697  | 3.004014  | 0.902735  |
| H        | 4.092332  | -0.020319 | -0.254706 | H        | -4.147519 | 0.042350  | 0.324661  | H       | 1.282986  | 3.720288  | -0.722926 |
| H        | 2.673660  | -1.652034 | -1.406851 | H        | -2.601584 | -1.513240 | 1.527022  | H       | 2.393716  | 1.719070  | -1.631328 |
| H        | 3.276910  | -2.400640 | 0.093187  | H        | -3.436153 | -2.291463 | 0.161201  | H       | 3.352430  | 2.480572  | -0.341334 |
| H        | -1.146433 | 3.761703  | -0.508404 | H        | 1.228373  | 3.712125  | 0.676200  | H       | -4.169776 | 0.116118  | -0.284252 |
| H        | -1.316705 | 3.175265  | 1.163575  | H        | 1.520680  | 3.188562  | -0.998475 | H       | -3.487042 | -0.620691 | 1.173423  |
| H        | -2.677184 | -1.642931 | 1.406991  | H        | 2.641080  | -1.678617 | -1.330837 | H       | 0.588856  | -3.156661 | 0.925585  |
| H        | -3.285288 | -2.390467 | -0.091607 | H        | 3.252641  | -2.474551 | 0.141516  | H       | 1.121633  | -3.819517 | -0.634888 |
| H        | -3.294806 | 2.417868  | 0.008691  | H        | 3.335197  | 2.394631  | 0.455079  | H       | -3.376739 | -2.136224 | -0.774442 |
| H        | -2.363074 | 1.925916  | -1.428169 | H        | 2.165351  | 1.675111  | 1.586648  | H       | -2.366984 | -0.977344 | -1.657473 |
| H        | -3.206654 | -0.256250 | -1.270967 | H        | 3.095998  | -0.338733 | 1.381315  | H       | -0.729194 | -2.586396 | -1.771736 |
| H        | -4.092478 | -0.007907 | 0.254707  | H        | 4.181797  | -0.203225 | -0.020906 | H       | -1.308469 | -3.799545 | -0.606734 |
| H        | 2.368812  | 1.918446  | 1.428407  | H        | -2.307143 | 1.933006  | -1.342584 | H       | -1.228841 | 3.164742  | 0.696053  |
| Li       | 0.002319  | 0.020916  | 0.000798  | Na       | 0.018754  | -0.014923 | -1.029394 | K       | 0.031987  | 0.017028  | 1.653806  |

**Table S8.** B3LYP optimized geometries (Cartesian coordinates in Å) for M(18C6) (M = Na, K).

| Na(18C6) |           |           |           | K(18C6) |           |           |           |
|----------|-----------|-----------|-----------|---------|-----------|-----------|-----------|
| H        | -0.058165 | 3.274171  | 3.287097  | H       | 1.197439  | 4.491721  | -0.063612 |
| O        | 0.095314  | 1.399580  | 2.424377  | O       | 0.000000  | 2.808176  | 0.077795  |
| O        | -0.254177 | 2.822371  | 0.000000  | O       | 2.437748  | 1.407434  | -0.262079 |
| O        | -0.258328 | -1.411690 | 2.444172  | O       | -2.437748 | 1.407434  | -0.262079 |
| O        | 0.095314  | 1.399580  | -2.424377 | O       | 2.431952  | -1.404088 | 0.077795  |
| O        | 0.098702  | -2.799736 | 0.000000  | O       | -2.431952 | -1.404088 | 0.077795  |
| O        | -0.258328 | -1.411690 | -2.444172 | O       | -0.000000 | -2.814869 | -0.262079 |
| C        | -0.366962 | 0.690133  | 3.559229  | C       | -1.186159 | 3.440177  | -0.377835 |
| C        | 0.246348  | 3.425861  | -1.181733 | C       | 3.569108  | 0.692331  | 0.217760  |
| C        | 0.244585  | -2.735960 | 2.376503  | C       | -3.569108 | 0.692331  | 0.217760  |
| C        | -0.361105 | 2.739050  | -2.377628 | C       | 3.572360  | -0.692844 | -0.377835 |
| C        | -0.359325 | -3.429345 | 1.182611  | C       | -3.572360 | -0.692844 | -0.377835 |
| C        | 0.246348  | 3.425861  | 1.181733  | C       | 2.384131  | 2.744773  | 0.217760  |
| C        | 0.238413  | -0.689885 | 3.559193  | C       | -2.384131 | 2.744773  | 0.217760  |
| C        | -0.366962 | 0.690133  | -3.559229 | C       | 2.386201  | -2.747333 | -0.377835 |
| C        | -0.359325 | -3.429345 | -1.182611 | C       | -2.386201 | -2.747333 | -0.377835 |
| C        | 0.238413  | -0.689885 | -3.559193 | C       | 1.184978  | -3.437104 | 0.217760  |
| C        | 0.244585  | -2.735960 | -2.376503 | C       | -1.184978 | -3.437104 | 0.217760  |
| C        | -0.361105 | 2.739050  | 2.377628  | C       | 1.186159  | 3.440177  | -0.377835 |
| H        | -1.461955 | 0.621732  | 3.545514  | H       | -1.234455 | 3.407463  | -1.472746 |
| H        | -0.067024 | 1.209815  | 4.478572  | H       | -1.197439 | 4.491721  | -0.063612 |
| H        | 1.338826  | 3.339816  | -1.217298 | H       | 3.541481  | 0.630922  | 1.312142  |
| H        | -0.021157 | 4.490839  | -1.205647 | H       | 4.493411  | 1.207306  | -0.075686 |
| H        | -0.023413 | -3.289820 | 3.286294  | H       | -4.493411 | 1.207306  | -0.075686 |
| H        | 1.337174  | -2.721669 | 2.285934  | H       | -3.541481 | 0.630922  | 1.312142  |
| H        | -1.456039 | 2.766291  | -2.312210 | H       | 3.568177  | -0.634662 | -1.472746 |
| H        | -0.058165 | 3.274171  | -3.287097 | H       | 4.488664  | -1.208848 | -0.063612 |
| H        | -0.054750 | -4.484038 | 1.192259  | H       | -4.488664 | -1.208848 | -0.063612 |
| H        | -1.454435 | -3.387992 | 1.236445  | H       | -3.568177 | -0.634662 | -1.472746 |
| H        | -0.021157 | 4.490839  | 1.205647  | H       | 3.292263  | 3.287756  | -0.075686 |
| H        | 1.338826  | 3.339816  | 1.217298  | H       | 2.317135  | 2.751552  | 1.312142  |
| H        | 1.331187  | -0.617509 | 3.507125  | H       | -2.317135 | 2.751552  | 1.312142  |
| H        | -0.033601 | -1.200717 | 4.492686  | H       | -3.292263 | 3.287756  | -0.075686 |
| H        | -0.067024 | 1.209815  | -4.478572 | H       | 3.291225  | -3.282873 | -0.063612 |
| H        | -1.461955 | 0.621732  | -3.545514 | H       | 2.333722  | -2.772801 | -1.472746 |
| H        | -1.454435 | -3.387992 | -1.236445 | H       | -2.333722 | -2.772801 | -1.472746 |
| H        | -0.054750 | -4.484038 | -1.192259 | H       | -3.291225 | -3.282873 | -0.063612 |
| H        | -0.033601 | -1.200717 | -4.492686 | H       | 1.201148  | -4.495061 | -0.075686 |
| H        | 1.331187  | -0.617509 | -3.507125 | H       | 1.224346  | -3.382473 | 1.312142  |
| H        | -0.023413 | -3.289820 | -3.286294 | H       | -1.201148 | -4.495061 | -0.075686 |
| H        | 1.337174  | -2.721669 | -2.285934 | H       | -1.224346 | -3.382473 | 1.312142  |
| H        | -1.456039 | 2.766291  | 2.312210  | H       | 1.234455  | 3.407463  | -1.472746 |
| Na       | 0.854117  | 0.001145  | 0.000000  | K       | 0.000000  | 0.000000  | 0.630787  |

**Table S9.** B3LYP harmonic vibrational frequencies ( $\text{cm}^{-1}$ ) for  $\text{M}(\text{en})_2$ ,  $\text{M}(\text{12C4})$ ,  $\text{M}(\text{15C5})$ , and  $\text{M}(\text{18C6})$  ( $\text{M} = \text{Li, Na, K}$ ).

| $\text{Li}(\text{en})_2$ | $\text{Na}(\text{en})_2$ | $\text{K}(\text{en})_2$ | $\text{Li}(\text{12C4})$ | $\text{Na}(\text{12C4})$ | $\text{K}(\text{12C4})$ | $\text{Li}(\text{15C5})$ | $\text{Na}(\text{15C5})$ | $\text{K}(\text{15C5})$ | $\text{Na}(\text{18C6})$ | $\text{K}(\text{18C6})$ |
|--------------------------|--------------------------|-------------------------|--------------------------|--------------------------|-------------------------|--------------------------|--------------------------|-------------------------|--------------------------|-------------------------|
| 41.5                     | 14.8                     | -6.7                    | 65.5                     | 50.5                     | 48.6                    | 26.6                     | 44.3                     | 52.8                    | -31.0                    | 37.2                    |
| 42.5                     | 17.0                     | -3.6                    | 111.4                    | 57.4                     | 56.8                    | 47.9                     | 54.7                     | 54.8                    | -28.3                    | 37.2                    |
| 50.2                     | 17.3                     | -2.5                    | 138.7                    | 92.0                     | 58.9                    | 55.2                     | 63.2                     | 80.0                    | 34.8                     | 49.7                    |
| 116.3                    | 84.0                     | 63.3                    | 154.3                    | 103.4                    | 74.5                    | 90.6                     | 71.1                     | 83.7                    | 35.2                     | 70.2                    |
| 118.4                    | 89.3                     | 70.6                    | 186.7                    | 103.5                    | 79.0                    | 94.1                     | 90.6                     | 89.1                    | 58.4                     | 86.2                    |
| 128.2                    | 102.4                    | 84.0                    | 203.1                    | 117.8                    | 118.9                   | 121.7                    | 119.7                    | 96.6                    | 59.4                     | 86.2                    |
| 232.7                    | 200.0                    | 137.0                   | 205.3                    | 151.3                    | 155.4                   | 136.7                    | 141.1                    | 116.6                   | 59.7                     | 113.9                   |
| 244.9                    | 204.3                    | 141.2                   | 216.9                    | 158.9                    | 155.5                   | 137.3                    | 145.7                    | 129.9                   | 66.9                     | 116.8                   |
| 313.2                    | 206.6                    | 156.8                   | 256.3                    | 171.1                    | 178.1                   | 160.2                    | 163.4                    | 142.4                   | 104.9                    | 116.9                   |
| 315.4                    | 227.6                    | 194.8                   | 261.9                    | 211.4                    | 223.3                   | 172.7                    | 169.3                    | 160.3                   | 131.4                    | 134.8                   |
| 320.5                    | 259.5                    | 202.5                   | 300.8                    | 222.7                    | 235.0                   | 174.8                    | 179.9                    | 170.4                   | 131.6                    | 134.8                   |
| 339.3                    | 266.6                    | 221.9                   | 314.1                    | 261.1                    | 247.3                   | 202.9                    | 185.1                    | 185.0                   | 135.9                    | 140.5                   |
| 388.2                    | 307.3                    | 267.6                   | 330.9                    | 308.3                    | 309.2                   | 219.7                    | 202.0                    | 204.8                   | 145.4                    | 146.6                   |
| 413.2                    | 310.6                    | 286.3                   | 350.9                    | 314.8                    | 314.8                   | 224.1                    | 210.1                    | 215.2                   | 145.9                    | 146.6                   |
| 413.9                    | 321.1                    | 290.8                   | 368.4                    | 338.0                    | 348.2                   | 238.0                    | 231.9                    | 232.6                   | 162.9                    | 167.0                   |
| 449.0                    | 353.3                    | 322.9                   | 429.2                    | 391.0                    | 373.6                   | 248.7                    | 239.8                    | 243.1                   | 210.4                    | 219.1                   |
| 526.2                    | 355.1                    | 323.2                   | 455.5                    | 407.5                    | 393.2                   | 278.3                    | 254.6                    | 288.2                   | 212.8                    | 222.5                   |
| 538.2                    | 512.0                    | 501.0                   | 523.4                    | 514.7                    | 519.2                   | 299.8                    | 296.6                    | 298.9                   | 233.4                    | 234.6                   |
| 554.8                    | 519.9                    | 508.2                   | 535.0                    | 526.5                    | 527.2                   | 341.8                    | 330.7                    | 324.9                   | 234.1                    | 234.6                   |
| 828.9                    | 824.2                    | 813.9                   | 538.1                    | 526.8                    | 527.5                   | 343.6                    | 339.4                    | 330.6                   | 243.2                    | 247.9                   |
| 839.1                    | 824.4                    | 818.6                   | 569.5                    | 538.4                    | 544.7                   | 345.3                    | 343.5                    | 346.4                   | 244.6                    | 247.9                   |
| 861.9                    | 849.9                    | 847.1                   | 824.4                    | 813.5                    | 816.6                   | 350.6                    | 346.4                    | 380.3                   | 264.6                    | 263.7                   |
| 862.4                    | 850.4                    | 848.3                   | 829.4                    | 821.3                    | 825.2                   | 544.3                    | 529.1                    | 517.0                   | 311.6                    | 311.6                   |
| 911.8                    | 902.2                    | 885.1                   | 832.7                    | 830.4                    | 829.7                   | 555.1                    | 541.0                    | 537.3                   | 311.8                    | 311.6                   |
| 936.4                    | 905.0                    | 889.5                   | 850.2                    | 848.1                    | 846.1                   | 556.1                    | 548.2                    | 540.6                   | 350.6                    | 345.5                   |
| 977.0                    | 970.9                    | 968.6                   | 910.0                    | 917.6                    | 919.2                   | 562.1                    | 552.9                    | 552.4                   | 358.1                    | 356.1                   |
| 979.8                    | 971.0                    | 968.9                   | 931.5                    | 919.7                    | 923.2                   | 585.1                    | 563.4                    | 575.4                   | 358.7                    | 356.1                   |
| 999.7                    | 990.5                    | 984.1                   | 937.0                    | 931.1                    | 930.2                   | 824.5                    | 821.5                    | 814.4                   | 528.7                    | 528.9                   |
| 1000.8                   | 994.9                    | 987.6                   | 938.4                    | 942.0                    | 938.5                   | 841.5                    | 836.8                    | 835.8                   | 528.9                    | 528.9                   |
| 1045.1                   | 1048.4                   | 1049.9                  | 1018.0                   | 1029.4                   | 1035.7                  | 850.6                    | 844.8                    | 838.1                   | 535.4                    | 537.3                   |
| 1048.1                   | 1048.6                   | 1050.3                  | 1018.6                   | 1046.7                   | 1048.7                  | 852.4                    | 847.2                    | 847.3                   | 550.2                    | 546.7                   |
| 1097.0                   | 1104.6                   | 1109.7                  | 1036.5                   | 1065.8                   | 1060.7                  | 899.1                    | 872.5                    | 862.7                   | 550.2                    | 546.7                   |
| 1097.3                   | 1104.9                   | 1109.8                  | 1069.0                   | 1069.2                   | 1061.5                  | 926.4                    | 933.0                    | 924.7                   | 587.4                    | 582.9                   |
| 1111.0                   | 1113.6                   | 1113.9                  | 1080.6                   | 1088.8                   | 1088.5                  | 960.9                    | 941.8                    | 934.5                   | 840.7                    | 837.4                   |
| 1113.8                   | 1113.7                   | 1114.9                  | 1093.9                   | 1119.7                   | 1120.0                  | 961.9                    | 943.2                    | 941.9                   | 840.8                    | 837.4                   |
| 1291.9                   | 1291.1                   | 1289.3                  | 1106.6                   | 1120.6                   | 1123.5                  | 974.7                    | 959.6                    | 953.9                   | 849.1                    | 844.8                   |
| 1293.6                   | 1291.4                   | 1289.7                  | 1113.5                   | 1122.0                   | 1125.2                  | 982.2                    | 968.4                    | 960.4                   | 851.6                    | 849.6                   |
| 1302.3                   | 1307.1                   | 1308.3                  | 1133.9                   | 1152.6                   | 1157.4                  | 1058.6                   | 1055.6                   | 1046.2                  | 851.8                    | 849.6                   |
| 1302.5                   | 1307.6                   | 1308.6                  | 1147.6                   | 1163.8                   | 1166.4                  | 1058.9                   | 1057.1                   | 1058.1                  | 879.3                    | 880.2                   |
| 1349.5                   | 1350.3                   | 1349.3                  | 1147.6                   | 1183.1                   | 1182.9                  | 1068.7                   | 1058.0                   | 1060.7                  | 932.8                    | 929.9                   |
| 1350.1                   | 1351.4                   | 1350.6                  | 1172.4                   | 1184.3                   | 1184.3                  | 1080.2                   | 1093.7                   | 1084.6                  | 948.0                    | 943.5                   |
| 1407.7                   | 1410.1                   | 1412.0                  | 1240.7                   | 1253.2                   | 1251.0                  | 1099.6                   | 1098.0                   | 1094.1                  | 962.4                    | 959.1                   |
| 1408.1                   | 1411.9                   | 1413.7                  | 1255.6                   | 1270.5                   | 1270.0                  | 1103.7                   | 1101.9                   | 1098.5                  | 962.4                    | 959.1                   |
| 1423.9                   | 1425.9                   | 1428.1                  | 1260.6                   | 1277.1                   | 1274.4                  | 1104.3                   | 1113.5                   | 1113.6                  | 978.3                    | 974.7                   |
| 1423.9                   | 1426.5                   | 1428.8                  | 1268.5                   | 1290.5                   | 1289.6                  | 1110.1                   | 1116.6                   | 1117.0                  | 978.4                    | 974.7                   |
| 1498.7                   | 1499.8                   | 1502.2                  | 1269.7                   | 1296.2                   | 1294.5                  | 1119.9                   | 1128.9                   | 1129.0                  | 1070.9                   | 1067.5                  |
| 1499.8                   | 1501.0                   | 1502.8                  | 1274.4                   | 1304.6                   | 1300.6                  | 1132.6                   | 1137.2                   | 1135.5                  | 1071.0                   | 1067.5                  |
| 1500.6                   | 1501.4                   | 1502.9                  | 1282.1                   | 1308.8                   | 1304.4                  | 1138.6                   | 1139.4                   | 1143.6                  | 1078.9                   | 1076.5                  |
| 1500.9                   | 1501.6                   | 1503.1                  | 1285.8                   | 1313.1                   | 1307.7                  | 1142.2                   | 1146.5                   | 1154.3                  | 1099.9                   | 1097.2                  |
| 1624.0                   | 1631.2                   | 1640.3                  | 1367.9                   | 1377.6                   | 1375.4                  | 1146.2                   | 1154.0                   | 1160.1                  | 1099.9                   | 1098.1                  |
| 1626.6                   | 1632.6                   | 1640.6                  | 1382.2                   | 1390.1                   | 1389.7                  | 1164.9                   | 1168.5                   | 1165.1                  | 1106.2                   | 1098.1                  |
| 1632.2                   | 1636.0                   | 1642.4                  | 1382.8                   | 1393.9                   | 1390.6                  | 1166.2                   | 1172.2                   | 1172.6                  | 1109.8                   | 1107.3                  |
| 1633.8                   | 1636.5                   | 1643.1                  | 1390.0                   | 1397.6                   | 1395.5                  | 1255.7                   | 1253.8                   | 1253.1                  | 1127.1                   | 1116.9                  |
| 2990.1                   | 2981.1                   | 2968.8                  | 1418.9                   | 1424.4                   | 1424.0                  | 1259.4                   | 1257.3                   | 1256.9                  | 1127.1                   | 1116.9                  |
| 2990.3                   | 2981.1                   | 2968.9                  | 1429.1                   | 1427.5                   | 1428.1                  | 1267.5                   | 1268.1                   | 1263.0                  | 1132.6                   | 1125.9                  |
| 3000.8                   | 2994.3                   | 2984.4                  | 1429.5                   | 1441.3                   | 1439.0                  | 1268.4                   | 1269.5                   | 1267.6                  | 1132.7                   | 1125.9                  |
| 3001.8                   | 2995.1                   | 2985.2                  | 1440.4                   | 1447.0                   | 1445.6                  | 1271.1                   | 1273.8                   | 1273.5                  | 1134.0                   | 1132.0                  |
| 3052.4                   | 3046.5                   | 3038.7                  | 1488.6                   | 1487.1                   | 1486.1                  | 1276.5                   | 1282.2                   | 1288.1                  | 1152.8                   | 1150.8                  |
| 3053.0                   | 3047.1                   | 3039.1                  | 1488.6                   | 1487.7                   | 1486.7                  | 1284.7                   | 1286.4                   | 1290.2                  | 1152.9                   | 1150.8                  |
| 3067.2                   | 3062.1                   | 3056.0                  | 1489.0                   | 1491.6                   | 1493.3                  | 1291.4                   | 1295.8                   | 1301.9                  | 1160.4                   | 1151.5                  |
| 3067.8                   | 3062.7                   | 3056.4                  | 1490.3                   | 1491.9                   | 1493.5                  | 1295.0                   | 1299.1                   | 1303.7                  | 1160.5                   | 1151.5                  |





**Table S10.** Vertical excitation energies (eV) for Li(en)<sub>2</sub> at the KT, D2, P3, P3+, and EOM-EA-CCSD levels of theory.

| Occupied orbital               | H: DATZ, Li,C,N: TZ |       |       |       |             |
|--------------------------------|---------------------|-------|-------|-------|-------------|
|                                | KT                  | D2    | P3    | P3+   | EOM-EA-CCSD |
| 11 <sup>2</sup> a              | 0.000               | 0.000 | 0.000 | 0.000 | 0.000       |
| 9 <sup>2</sup> b <sub>1</sub>  | 0.262               | 0.355 | 0.350 | 0.350 | 0.369       |
| 9 <sup>2</sup> b <sub>2</sub>  | 0.310               | 0.422 | 0.416 | 0.416 | 0.436       |
| 10 <sup>2</sup> b <sub>3</sub> | 0.483               | 0.613 | 0.607 | 0.608 | 0.621       |
| 10 <sup>2</sup> b <sub>2</sub> | 0.809               | 1.017 | 1.010 | 1.011 | 1.046       |
| 12 <sup>2</sup> a              | 0.826               | 1.029 | 1.021 | 1.022 | 1.059       |
| 13 <sup>2</sup> a              | 0.812               | 1.054 | 1.047 | 1.047 | 1.106       |
| 11 <sup>2</sup> b <sub>3</sub> | 0.819               | 1.057 | 1.049 | 1.050 | 1.100       |
| 10 <sup>2</sup> b <sub>1</sub> | 0.854               | 1.087 | 1.079 | 1.079 | 1.127       |
| 14 <sup>2</sup> a              | 1.205               | 1.384 | 1.387 | 1.386 | 1.419       |
| 11 <sup>2</sup> b <sub>2</sub> | 1.231               | 1.466 | 1.462 | 1.462 | 1.477       |
| 11 <sup>2</sup> b <sub>1</sub> | 1.230               | 1.469 | 1.465 | 1.465 | 1.478       |
| 12 <sup>2</sup> b <sub>3</sub> | 1.244               | 1.506 | 1.502 | 1.502 | 1.524       |
| 13 <sup>2</sup> b <sub>3</sub> | 1.308               | 1.620 | 1.614 | 1.614 | 1.668       |
| 15 <sup>2</sup> a              | 1.343               | 1.620 | 1.616 | 1.616 | 1.682       |
| 12 <sup>2</sup> b <sub>1</sub> | 1.385               | 1.620 | 1.618 | 1.618 | 1.672       |
| 12 <sup>2</sup> b <sub>2</sub> | 1.397               | 1.643 | 1.640 | 1.640 | 1.700       |
| 13 <sup>2</sup> b <sub>1</sub> | 1.347               | 1.670 | 1.665 | 1.665 | 1.721       |
| 14 <sup>2</sup> b <sub>3</sub> | 1.604               | 1.757 | 1.757 | 1.757 | 1.779       |
| 13 <sup>2</sup> b <sub>2</sub> | 1.559               | 1.870 | 1.865 | 1.865 | 1.840       |
| 15 <sup>2</sup> b <sub>3</sub> | 1.695               | 1.895 | 1.890 | 1.891 |             |
| 16 <sup>2</sup> a              | 1.691               | 1.897 | 1.893 | 1.893 |             |
| 14 <sup>2</sup> b <sub>2</sub> | 1.714               | 1.901 | 1.899 | 1.899 |             |
| 17 <sup>2</sup> a              | 1.722               | 1.909 | 1.904 | 1.904 |             |
| 14 <sup>2</sup> b <sub>1</sub> | 1.763               | 1.942 | 1.937 | 1.937 |             |
| 15 <sup>2</sup> b <sub>1</sub> | 2.067               | 2.244 | 2.239 | 2.239 |             |
| 16 <sup>2</sup> b <sub>3</sub> | 2.104               | 2.244 | 2.242 | 2.242 |             |
| 15 <sup>2</sup> b <sub>2</sub> | 2.072               | 2.251 | 2.245 | 2.245 |             |
| 18 <sup>2</sup> a              | 2.184 <sup>a</sup>  | 2.360 | 2.355 | 2.356 |             |
| 16 <sup>2</sup> b <sub>2</sub> | 2.208 <sup>a</sup>  | 2.399 | 2.389 | 2.390 |             |
| 17 <sup>2</sup> b <sub>3</sub> | 2.217 <sup>a</sup>  | 2.415 | 2.408 | 2.408 |             |
| 16 <sup>2</sup> b <sub>1</sub> | 2.250 <sup>a</sup>  | 2.470 | 2.464 | 2.464 |             |

<sup>a</sup> States are not bound with respect to the ionization energy at KT level of theory.

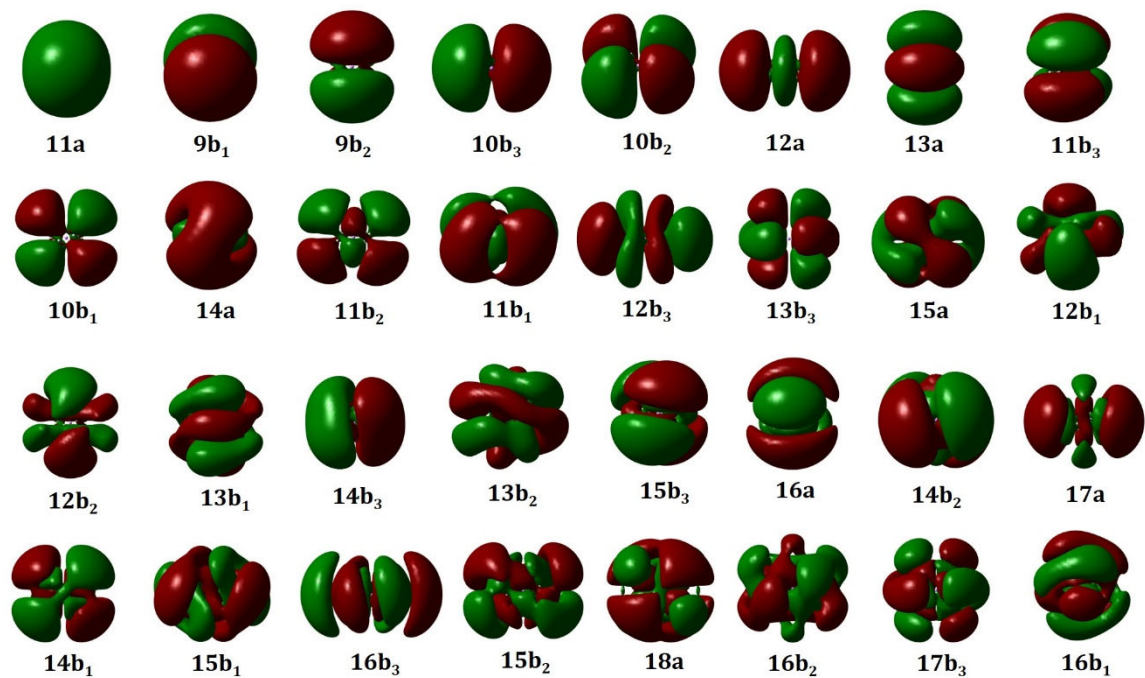

**Figure S1.** Dyson orbitals for vertical electron attachment to  $\text{Li(en)}_2^+$ .

**Table S11.** Vertical excitation energies (eV) for Na(en)<sub>2</sub> at the KT, D2, P3, and P3+ levels of theory.

| Occupied orbital               | H: DATZ, Na,C,N: TZ |       |       |       |
|--------------------------------|---------------------|-------|-------|-------|
|                                | KT                  | D2    | P3    | P3+   |
| 12 <sup>2</sup> a              | 0.000               | 0.000 | 0.000 | 0.000 |
| 10 <sup>2</sup> b <sub>1</sub> | 0.279               | 0.382 | 0.376 | 0.376 |
| 9 <sup>2</sup> b <sub>2</sub>  | 0.320               | 0.439 | 0.433 | 0.434 |
| 12 <sup>2</sup> b <sub>3</sub> | 0.517               | 0.645 | 0.641 | 0.641 |
| 13 <sup>2</sup> a              | 0.811               | 0.996 | 0.990 | 0.991 |
| 10 <sup>2</sup> b <sub>2</sub> | 0.810               | 1.008 | 1.004 | 1.004 |
| 11 <sup>2</sup> b <sub>1</sub> | 0.856               | 1.078 | 1.072 | 1.073 |
| 13 <sup>2</sup> b <sub>3</sub> | 0.841               | 1.087 | 1.081 | 1.082 |
| 14 <sup>2</sup> a              | 0.837               | 1.089 | 1.083 | 1.083 |
| 15 <sup>2</sup> a              | 1.174               | 1.353 | 1.356 | 1.356 |
| 11 <sup>2</sup> b <sub>2</sub> | 1.184               | 1.407 | 1.404 | 1.405 |
| 12 <sup>2</sup> b <sub>1</sub> | 1.184               | 1.410 | 1.406 | 1.407 |
| 14 <sup>2</sup> b <sub>3</sub> | 1.223               | 1.474 | 1.471 | 1.471 |
| 15 <sup>2</sup> b <sub>3</sub> | 1.292               | 1.593 | 1.589 | 1.589 |
| 16 <sup>2</sup> a              | 1.323               | 1.598 | 1.595 | 1.595 |
| 12 <sup>2</sup> b <sub>2</sub> | 1.365               | 1.630 | 1.628 | 1.628 |
| 13 <sup>2</sup> b <sub>1</sub> | 1.345               | 1.635 | 1.633 | 1.633 |
| 14 <sup>2</sup> b <sub>1</sub> | 1.375               | 1.664 | 1.662 | 1.662 |
| 16 <sup>2</sup> b <sub>3</sub> | 1.517               | 1.716 | 1.717 | 1.717 |
| 13 <sup>2</sup> b <sub>2</sub> | 1.579               | 1.866 | 1.864 | 1.864 |
| 17 <sup>2</sup> a              | 1.746               | 1.906 | 1.904 | 1.904 |
| 18 <sup>2</sup> a              | 1.712               | 1.918 | 1.914 | 1.915 |
| 17 <sup>2</sup> b <sub>3</sub> | 1.733               | 1.925 | 1.920 | 1.921 |
| 15 <sup>2</sup> b <sub>1</sub> | 1.768               | 1.926 | 1.924 | 1.924 |
| 14 <sup>2</sup> b <sub>2</sub> | 1.751               | 1.953 | 1.952 | 1.952 |
| 16 <sup>2</sup> b <sub>1</sub> | 2.000               | 2.187 | 2.183 | 2.184 |
| 18 <sup>2</sup> b <sub>3</sub> | 2.034               | 2.210 | 2.206 | 2.206 |
| 15 <sup>2</sup> b <sub>2</sub> | 2.048               | 2.225 | 2.219 | 2.220 |
| 19 <sup>2</sup> a              | 2.138 <sup>a</sup>  | 2.303 | 2.301 | 2.301 |
| 19 <sup>2</sup> b <sub>3</sub> | 2.179 <sup>a</sup>  | 2.380 | 2.375 | 2.376 |
| 16 <sup>2</sup> b <sub>2</sub> | 2.216 <sup>a</sup>  | 2.406 | 2.397 | 2.398 |
| 17 <sup>2</sup> b <sub>1</sub> | 2.251 <sup>a</sup>  | 2.456 | 2.451 | 2.451 |

<sup>a</sup> States are not bound with respect to the ionization energy at KT level of theory.

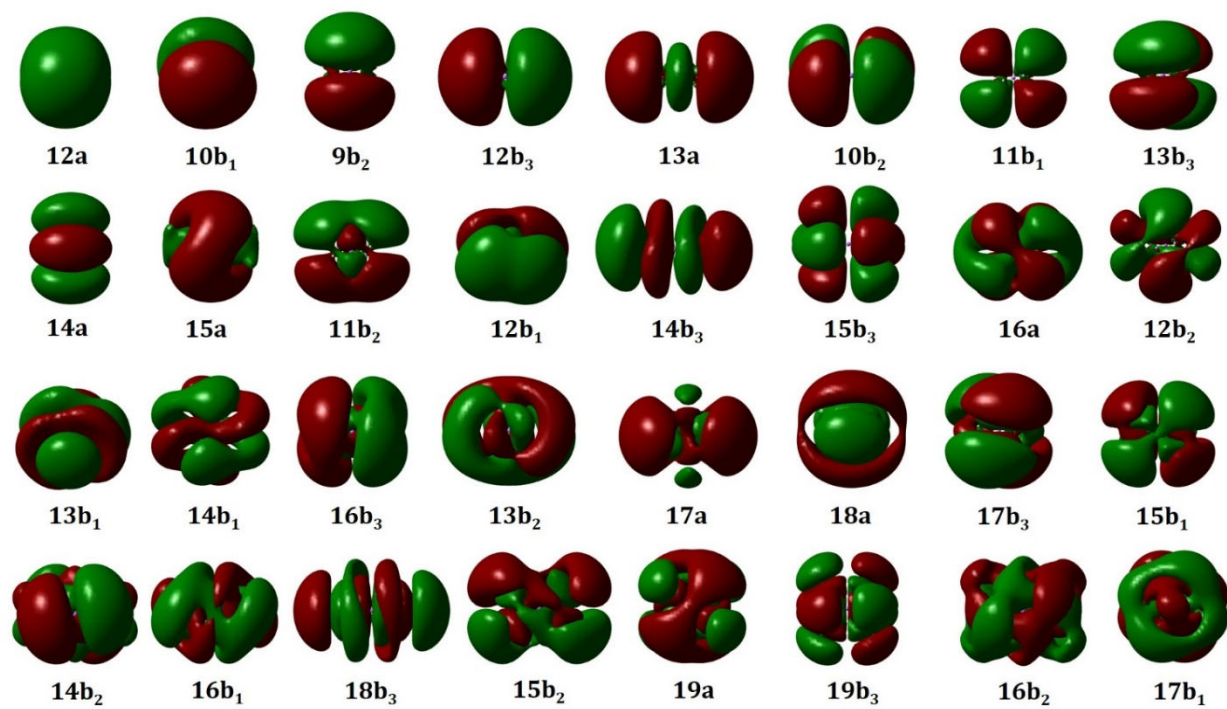

**Figure S2.** Dyson orbitals for vertical electron attachment to  $\text{Na}(\text{en})_2^+$ .

**Table S12.** Vertical excitation energies (eV) for K(en)<sub>2</sub> at the KT, D2, P3, and P3+ levels of theory.

| Occupied orbital               | H: DATZ, K,C,N: TZ |       |       |       |
|--------------------------------|--------------------|-------|-------|-------|
|                                | KT                 | D2    | P3    | P3+   |
| 13 <sup>2</sup> a              | 0.000              | 0.000 | 0.000 | 0.000 |
| 11 <sup>2</sup> b <sub>2</sub> | 0.362              | 0.455 | 0.451 | 0.451 |
| 11 <sup>2</sup> b <sub>1</sub> | 0.353              | 0.468 | 0.467 | 0.468 |
| 12 <sup>2</sup> b <sub>3</sub> | 0.616              | 0.710 | 0.711 | 0.712 |
| 14 <sup>2</sup> a              | 0.843              | 0.997 | 0.996 | 0.996 |
| 12 <sup>2</sup> b <sub>1</sub> | 0.879              | 1.032 | 1.031 | 1.032 |
| 12 <sup>2</sup> b <sub>2</sub> | 0.908              | 1.081 | 1.081 | 1.081 |
| 13 <sup>2</sup> b <sub>3</sub> | 0.894              | 1.107 | 1.105 | 1.106 |
| 15 <sup>2</sup> a              | 0.903              | 1.112 | 1.110 | 1.110 |
| 16 <sup>2</sup> a              | 1.167              | 1.361 | 1.364 | 1.365 |
| 13 <sup>2</sup> b <sub>1</sub> | 1.188              | 1.399 | 1.400 | 1.400 |
| 13 <sup>2</sup> b <sub>2</sub> | 1.205              | 1.413 | 1.412 | 1.413 |
| 14 <sup>2</sup> b <sub>3</sub> | 1.257              | 1.462 | 1.462 | 1.463 |
| 17 <sup>2</sup> a              | 1.349              | 1.590 | 1.591 | 1.592 |
| 15 <sup>2</sup> b <sub>3</sub> | 1.341              | 1.599 | 1.600 | 1.600 |
| 14 <sup>2</sup> b <sub>2</sub> | 1.389              | 1.613 | 1.616 | 1.616 |
| 14 <sup>2</sup> b <sub>1</sub> | 1.391              | 1.640 | 1.642 | 1.642 |
| 16 <sup>2</sup> b <sub>3</sub> | 1.534              | 1.705 | 1.711 | 1.711 |
| 15 <sup>2</sup> b <sub>2</sub> | 1.484              | 1.763 | 1.765 | 1.766 |
| 15 <sup>2</sup> b <sub>1</sub> | 1.569              | 1.802 | 1.804 | 1.804 |
| 16 <sup>2</sup> b <sub>2</sub> | 1.709              | 1.858 | 1.861 | 1.861 |
| 18 <sup>2</sup> a              | 1.656              | 1.867 | 1.866 | 1.867 |
| 17 <sup>2</sup> b <sub>3</sub> | 1.668              | 1.876 | 1.876 | 1.876 |
| 19 <sup>2</sup> a              | 1.752              | 1.882 | 1.886 | 1.886 |
| 16 <sup>2</sup> b <sub>1</sub> | 1.774              | 1.948 | 1.951 | 1.951 |
| 17 <sup>2</sup> b <sub>1</sub> | 1.864              | 2.068 | 2.070 | 2.070 |
| 17 <sup>2</sup> b <sub>2</sub> | 2.033              | 2.187 | 2.189 | 2.189 |
| 18 <sup>2</sup> b <sub>3</sub> | 2.057              | 2.192 | 2.192 | 2.193 |
| 18 <sup>2</sup> b <sub>1</sub> | 2.138 <sup>a</sup> | 2.286 | 2.285 | 2.285 |
| 20 <sup>2</sup> a              | 2.123              | 2.301 | 2.301 | 2.301 |
| 21 <sup>2</sup> a              | 2.151 <sup>a</sup> | 2.300 | 2.302 | 2.302 |
| 18 <sup>2</sup> b <sub>2</sub> | 2.168 <sup>a</sup> | 2.345 | 2.343 | 2.344 |
| 19 <sup>2</sup> b <sub>3</sub> | 2.217 <sup>a</sup> | 2.390 | 2.390 | 2.390 |

<sup>a</sup> States are not bound with respect to the ionization energy at KT level of theory.

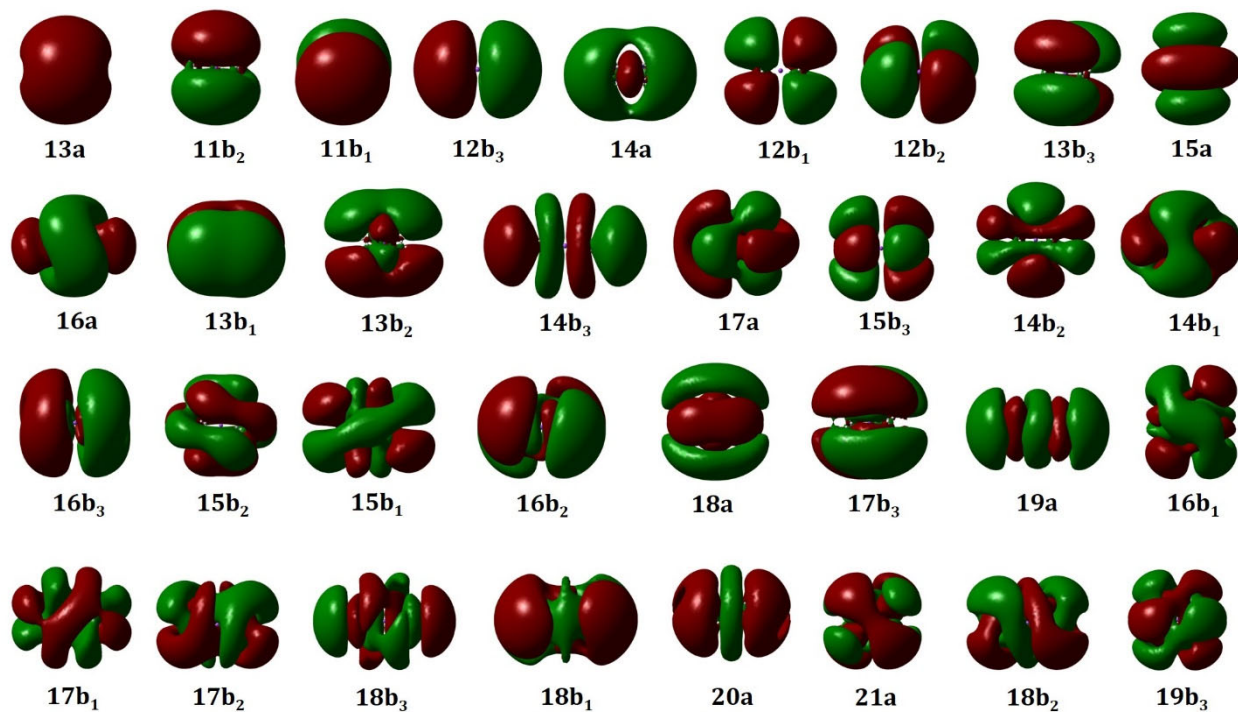

**Figure S3.** Dyson orbitals for vertical electron attachment to  $\text{K(en)}_2^+$ .

**Table S13.** Vertical excitation energies (eV) for Li(12C4) at the KT, D2, P3, and P3+ levels of theory.

| Occupied orbital | H: DATZ, Li,C,O: TZ |       |       |       | H: DATZ, Li: ATZ, C,O: TZ |  |
|------------------|---------------------|-------|-------|-------|---------------------------|--|
|                  | KT                  | D2    | P3    | P3+   | P3+                       |  |
| 17a <sub>1</sub> | 0.000               | 0.000 | 0.000 | 0.000 | 0.000                     |  |
| 18a <sub>1</sub> | 0.421               | 0.609 | 0.587 | 0.590 | 0.589                     |  |
| 13b <sub>1</sub> | 0.488               | 0.681 | 0.654 | 0.656 | 0.657                     |  |
| 13b <sub>2</sub> | 0.557               | 0.786 | 0.758 | 0.760 | 0.760                     |  |
| 19a <sub>1</sub> | 0.819               | 1.048 | 1.031 | 1.033 | 1.032                     |  |
| 10a <sub>2</sub> | 0.869               | 1.135 | 1.106 | 1.109 | 1.109                     |  |
| 20a <sub>1</sub> | 0.881               | 1.155 | 1.126 | 1.129 | 1.126                     |  |
| 14b <sub>1</sub> | 0.873               | 1.161 | 1.136 | 1.138 | 1.138                     |  |
| 14b <sub>2</sub> | 0.894               | 1.182 | 1.157 | 1.159 | 1.158                     |  |
| 21a <sub>1</sub> | 1.136               | 1.385 | 1.374 | 1.375 | 1.359                     |  |
| 15b <sub>1</sub> | 1.308               | 1.612 | 1.592 | 1.594 | 1.560                     |  |
| 16b <sub>1</sub> | 1.296               | 1.639 | 1.613 | 1.615 | 1.616                     |  |
| 15b <sub>2</sub> | 1.295               | 1.641 | 1.614 | 1.617 | 1.617                     |  |
| 11a <sub>2</sub> | 1.327               | 1.691 | 1.667 | 1.669 | 1.669                     |  |
| 16b <sub>2</sub> | 1.356               | 1.712 | 1.690 | 1.692 | 1.673                     |  |
| 22a <sub>1</sub> | 1.564               | 1.734 | 1.721 | 1.723 | 1.596                     |  |
| 17b <sub>1</sub> | 1.618               | 1.848 | 1.827 | 1.829 | 1.771                     |  |
| 23a <sub>1</sub> | 1.670               | 1.899 | 1.874 | 1.876 | 1.678                     |  |



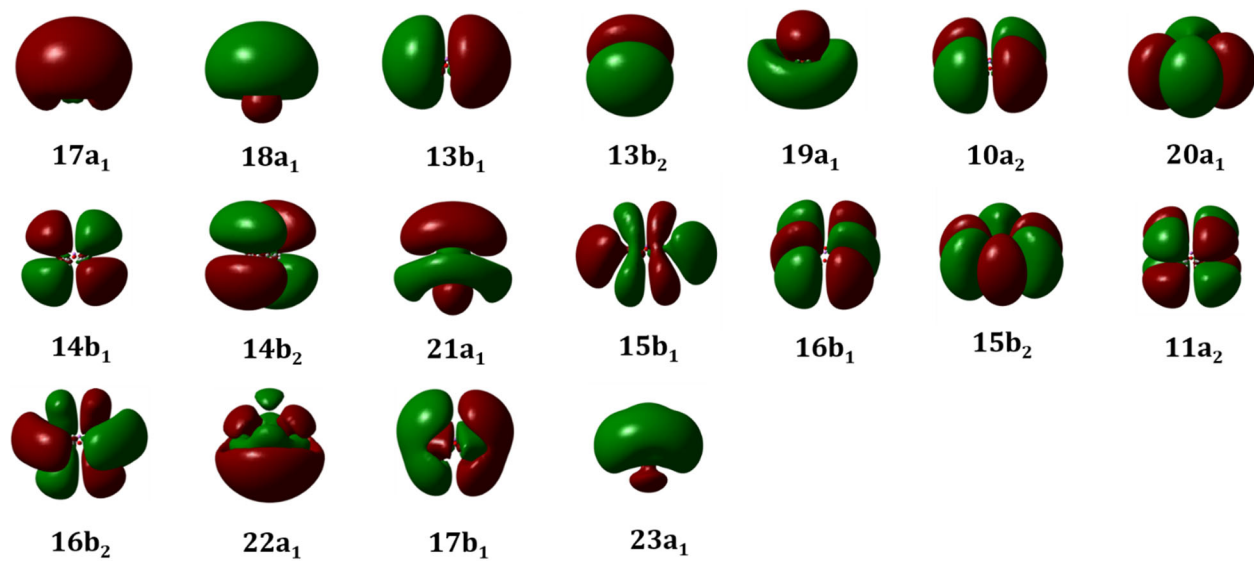

**Figure S4.** Dyson orbitals for vertical electron attachment to Li(12C4)<sup>+</sup>.

**Table S14.** Vertical excitation energies (eV) for Na(12C4) at the KT, D2, P3, and P3+ levels of theory.

| Occupied orbital | H: DATZ, Na,C,O: TZ |       |       |       |
|------------------|---------------------|-------|-------|-------|
|                  | KT                  | D2    | P3    | P3+   |
| 19a <sub>1</sub> | 0.000               | 0.000 | 0.000 | 0.000 |
| 14b <sub>1</sub> | 1.315               | 1.381 | 1.367 | 1.367 |
| 14b <sub>2</sub> | 1.327               | 1.437 | 1.422 | 1.422 |
| 20a <sub>1</sub> | 1.679               | 1.880 | 1.858 | 1.858 |
| 21a <sub>1</sub> | 1.904               | 2.120 | 2.108 | 2.108 |
| 10a <sub>2</sub> | 1.983               | 2.199 | 2.177 | 2.177 |
| 15b <sub>2</sub> | 1.986               | 2.211 | 2.189 | 2.189 |
| 22a <sub>1</sub> | 2.028               | 2.236 | 2.214 | 2.214 |
| 15b <sub>1</sub> | 2.025               | 2.258 | 2.237 | 2.237 |
| 23a <sub>1</sub> | 2.085               | 2.295 | 2.280 | 2.280 |
| 16b <sub>1</sub> | 2.326               | 2.541 | 2.529 | 2.529 |
| 16b <sub>2</sub> | 2.361               | 2.622 | 2.608 | 2.608 |
| 11a <sub>2</sub> | 2.451               | 2.758 | 2.738 | 2.738 |
| 17b <sub>1</sub> | 2.462               | 2.762 | 2.741 | 2.741 |
| 24a <sub>1</sub> | 2.490               | 2.759 | 2.743 | 2.743 |
| 17b <sub>2</sub> | 2.462               | 2.765 | 2.744 | 2.744 |
| 18b <sub>2</sub> | 2.600               | 2.868 | 2.851 | 2.851 |
| 18b <sub>1</sub> | 2.635               | 2.914 | 2.897 | 2.897 |
| 25a <sub>1</sub> | 2.772               | 2.931 | 2.914 | 2.914 |
| 12a <sub>2</sub> | 2.804               | 3.049 | 3.031 | 3.031 |
| 19b <sub>2</sub> | 2.872               | 3.075 | 3.055 | 3.055 |
| 19b <sub>1</sub> | 2.900               | 3.110 | 3.089 | 3.089 |
| 26a <sub>1</sub> | 2.941               | 3.116 | 3.097 | 3.097 |
| 27a <sub>1</sub> | 3.003               | 3.167 | 3.152 | 3.152 |
| 13a <sub>2</sub> | 2.855               | 3.202 | 3.184 | 3.184 |
| 14a <sub>2</sub> | 3.008               | 3.286 | 3.267 | 3.267 |
| 28a <sub>1</sub> | 3.255               | 3.389 | 3.365 | 3.365 |
| 20b <sub>2</sub> | 3.193               | 3.437 | 3.417 | 3.417 |
| 20b <sub>1</sub> | 3.250               | 3.462 | 3.442 | 3.442 |
| 21b <sub>1</sub> | 3.382               | 3.459 | 3.451 | 3.451 |
| 15a <sub>2</sub> | 3.308               | 3.515 | 3.494 | 3.494 |
| 29a <sub>1</sub> | 3.447               | 3.523 | 3.518 | 3.518 |
| 22b <sub>1</sub> | 3.386               | 3.548 | 3.533 | 3.533 |
| 21b <sub>2</sub> | 3.374               | 3.566 | 3.543 | 3.543 |

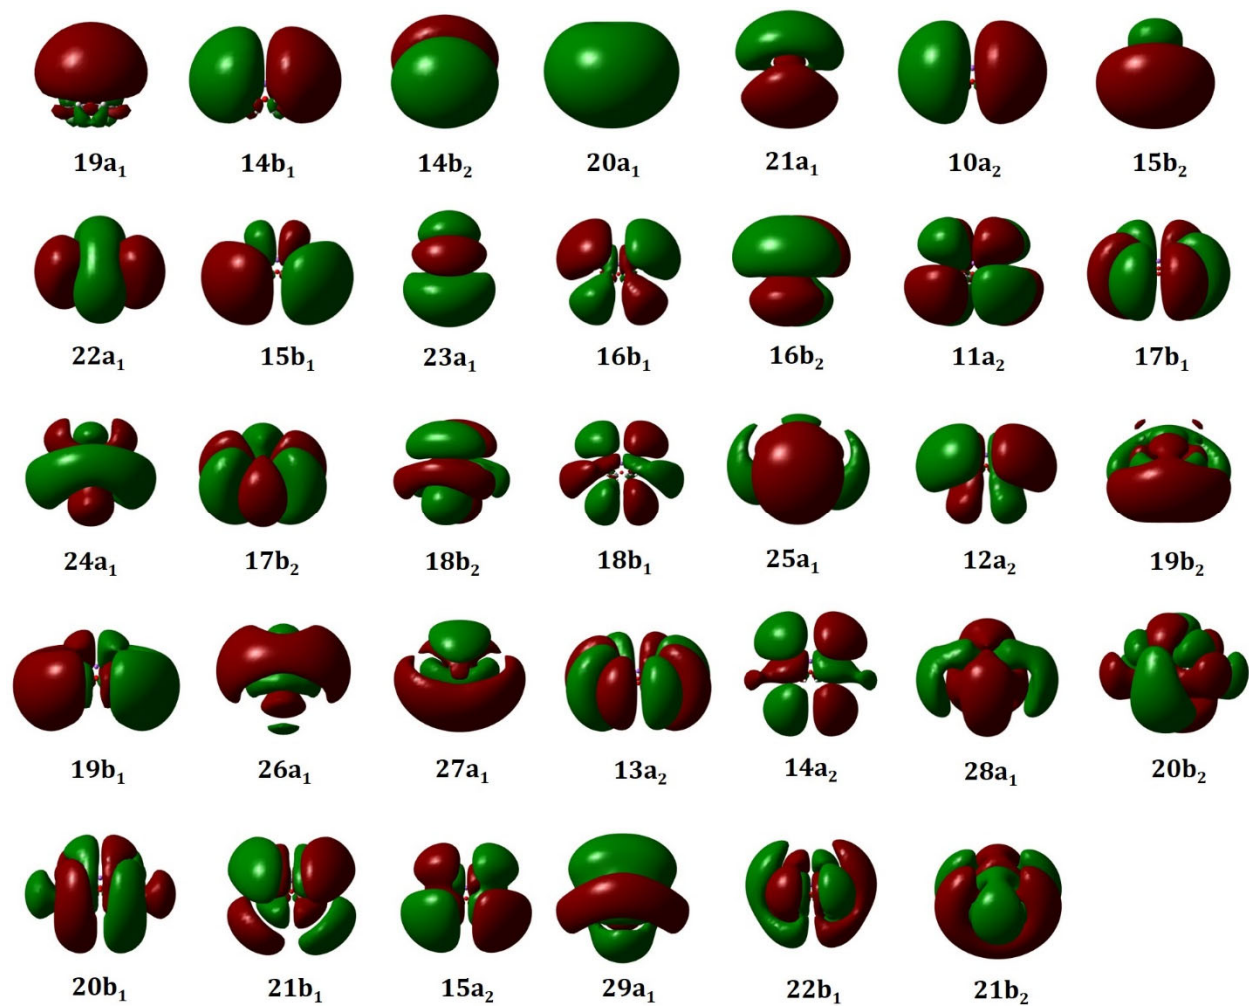

Figure S5. Dyson orbitals for vertical electron attachment to Na(12C4)<sup>+</sup>.

**Table S15.** Vertical excitation energies (eV) for K(12C4) at the KT, D2, P3, and P3+ levels of theory.

| Occupied orbital | H: DATZ, K,C,O: TZ |       |       |       |
|------------------|--------------------|-------|-------|-------|
|                  | KT                 | D2    | P3    | P3+   |
| 21a <sub>1</sub> | 0.000              | 0.000 | 0.000 | 0.000 |
| 15b <sub>1</sub> | 0.998              | 1.019 | 1.012 | 1.012 |
| 15b <sub>2</sub> | 1.030              | 1.077 | 1.071 | 1.072 |
| 22a <sub>1</sub> | 1.476              | 1.533 | 1.524 | 1.524 |
| 23a <sub>1</sub> | 1.609              | 1.705 | 1.705 | 1.704 |
| 10a <sub>2</sub> | 1.704              | 1.780 | 1.770 | 1.771 |
| 24a <sub>1</sub> | 1.724              | 1.804 | 1.794 | 1.795 |
| 16b <sub>2</sub> | 1.787              | 1.896 | 1.885 | 1.886 |
| 16b <sub>1</sub> | 1.804              | 1.919 | 1.909 | 1.909 |
| 25a <sub>1</sub> | 1.839              | 1.948 | 1.942 | 1.942 |
| 17b <sub>1</sub> | 2.127              | 2.255 | 2.251 | 2.251 |
| 17b <sub>2</sub> | 2.156              | 2.311 | 2.306 | 2.307 |
| 11a <sub>2</sub> | 2.197              | 2.356 | 2.348 | 2.349 |
| 26a <sub>1</sub> | 2.216              | 2.371 | 2.365 | 2.365 |
| 27a <sub>1</sub> | 2.259              | 2.395 | 2.389 | 2.389 |
| 18b <sub>2</sub> | 2.235              | 2.399 | 2.390 | 2.391 |
| 19b <sub>2</sub> | 2.324              | 2.397 | 2.392 | 2.392 |
| 18b <sub>1</sub> | 2.248              | 2.414 | 2.405 | 2.405 |
| 19b <sub>1</sub> | 2.334              | 2.419 | 2.414 | 2.415 |
| 12a <sub>2</sub> | 2.509              | 2.611 | 2.607 | 2.607 |
| 28a <sub>1</sub> | 2.555              | 2.620 | 2.619 | 2.619 |
| 20b <sub>2</sub> | 2.564              | 2.715 | 2.709 | 2.710 |
| 20b <sub>1</sub> | 2.579              | 2.730 | 2.724 | 2.724 |
| 29a <sub>1</sub> | 2.718              | 2.773 | 2.765 | 2.765 |
| 13a <sub>2</sub> | 2.632              | 2.838 | 2.832 | 2.832 |
| 30a <sub>1</sub> | 2.831              | 2.865 | 2.860 | 2.861 |
| 31a <sub>1</sub> | 2.911              | 2.913 | 2.915 | 2.914 |
| 14a <sub>2</sub> | 2.768              | 2.925 | 2.920 | 2.920 |
| 21b <sub>2</sub> | 2.824              | 2.982 | 2.975 | 2.976 |
| 21b <sub>1</sub> | 2.886              | 3.008 | 3.001 | 3.001 |
| 15a <sub>2</sub> | 2.929              | 3.030 | 3.021 | 3.021 |
| 22b <sub>2</sub> | 2.990              | 3.095 | 3.086 | 3.087 |
| 22b <sub>1</sub> | 3.020 <sup>a</sup> | 3.118 | 3.111 | 3.112 |
| 32a <sub>1</sub> | 3.117 <sup>a</sup> | 3.182 | 3.178 | 3.178 |
| 23b <sub>1</sub> | 3.150 <sup>a</sup> | 3.199 | 3.187 | 3.188 |
| 23b <sub>2</sub> | 3.171 <sup>a</sup> | 3.233 | 3.220 | 3.221 |

<sup>a</sup> States are not bound at KT.

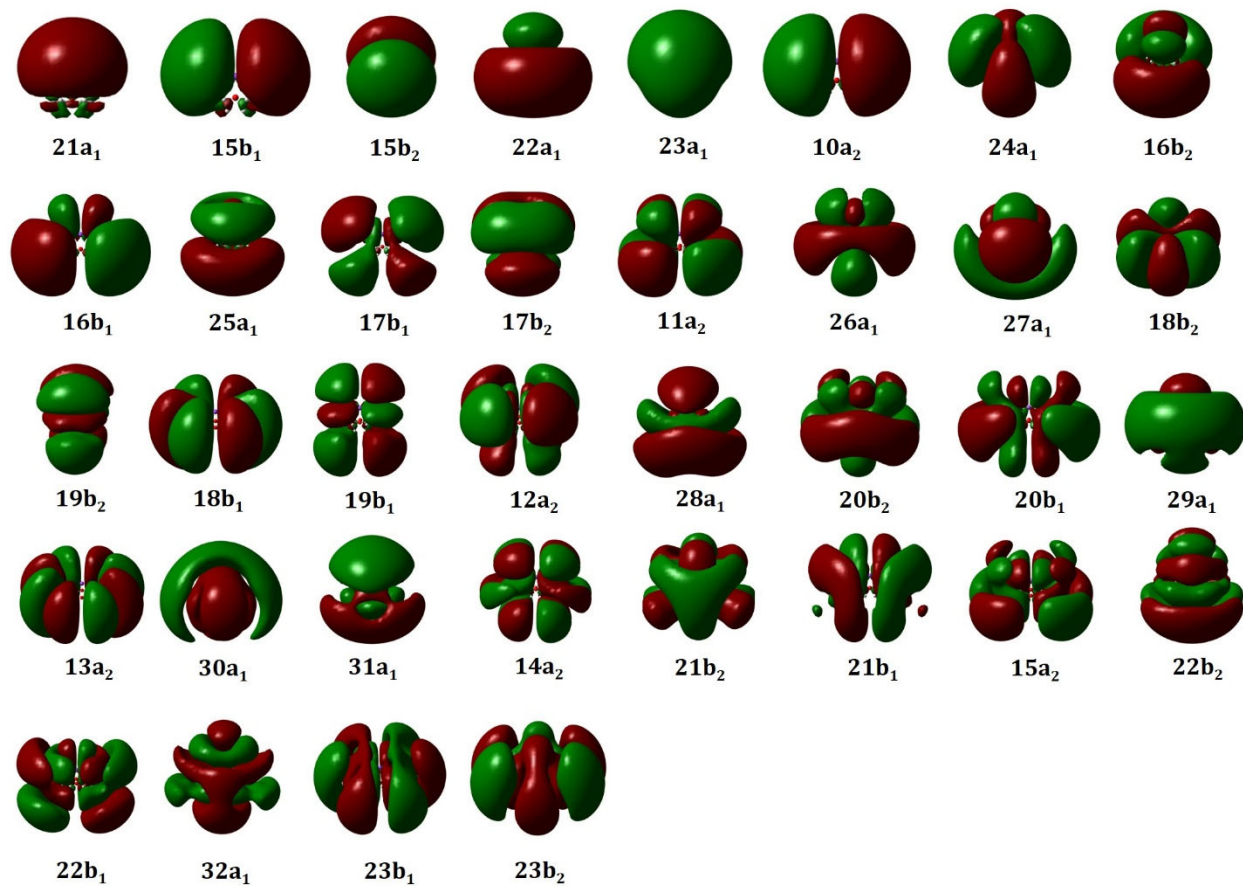

Figure S5. Dyson orbitals for vertical electron attachment to  $\text{K}(12\text{C}_4)^+$ .

**Table S16.** Vertical excitation energies (eV) for Li(15C5) at the KT, D2, P3, and P3+ levels of theory.

| Occupied orbital | H: DADZ, Li,C,O: DZ |       |       |       |
|------------------|---------------------|-------|-------|-------|
|                  | KT                  | D2    | P3    | P3+   |
| 62a              | 0.000               | 0.000 | 0.000 | 0.000 |
| 63a              | 0.124               | 0.131 | 0.136 | 0.135 |
| 64a              | 0.209               | 0.255 | 0.249 | 0.249 |
| 65a              | 0.232               | 0.286 | 0.280 | 0.280 |
| 66a              | 0.510               | 0.597 | 0.592 | 0.592 |
| 67a              | 0.512               | 0.599 | 0.594 | 0.593 |
| 68a              | 0.534               | 0.626 | 0.628 | 0.628 |
| 69a              | 0.550               | 0.657 | 0.656 | 0.655 |
| 70a              | 0.555               | 0.663 | 0.662 | 0.661 |
| 71a              | 0.889               | 1.027 | 1.024 | 1.024 |
| 72a              | 0.890               | 1.027 | 1.024 | 1.024 |
| 73a              | 0.964               | 1.130 | 1.130 | 1.130 |
| 74a              | 0.972               | 1.130 | 1.133 | 1.132 |
| 75a              | 0.978               | 1.135 | 1.136 | 1.135 |
| 76a              | 1.113               | 1.150 | 1.163 | 1.161 |
| 77a              | 0.997               | 1.160 | 1.163 | 1.162 |
| 78a              | 1.510               | 1.304 | 1.334 | 1.331 |
| 79a              | 1.392               | 1.397 | 1.411 | 1.409 |
| 80a              | 1.305               | 1.496 | 1.496 | 1.496 |
| 81a              | 1.306               | 1.496 | 1.496 | 1.496 |
| 82a              | 1.569               | 1.550 | 1.548 | 1.548 |
| 83a              | 1.383               | 1.561 | 1.564 | 1.563 |
| 84a              | 1.601               | 1.596 | 1.593 | 1.593 |
| 85a              | 1.713 <sup>a</sup>  | 1.700 | 1.700 | 1.700 |
| 86a              | 1.775 <sup>a</sup>  | 1.744 | 1.743 | 1.743 |
| 87a              | 1.758 <sup>a</sup>  | 1.745 | 1.745 | 1.745 |
| 88a              | 1.837 <sup>a</sup>  | 1.807 | 1.803 | 1.803 |
| 89a              | 1.813 <sup>a</sup>  | 1.816 | 1.819 | 1.818 |
| 90a              | 1.847 <sup>a</sup>  | 1.826 | 1.822 | 1.822 |
| 91a              | 1.629               | 1.826 | 1.829 | 1.828 |

<sup>a</sup> States are not bound at KT.

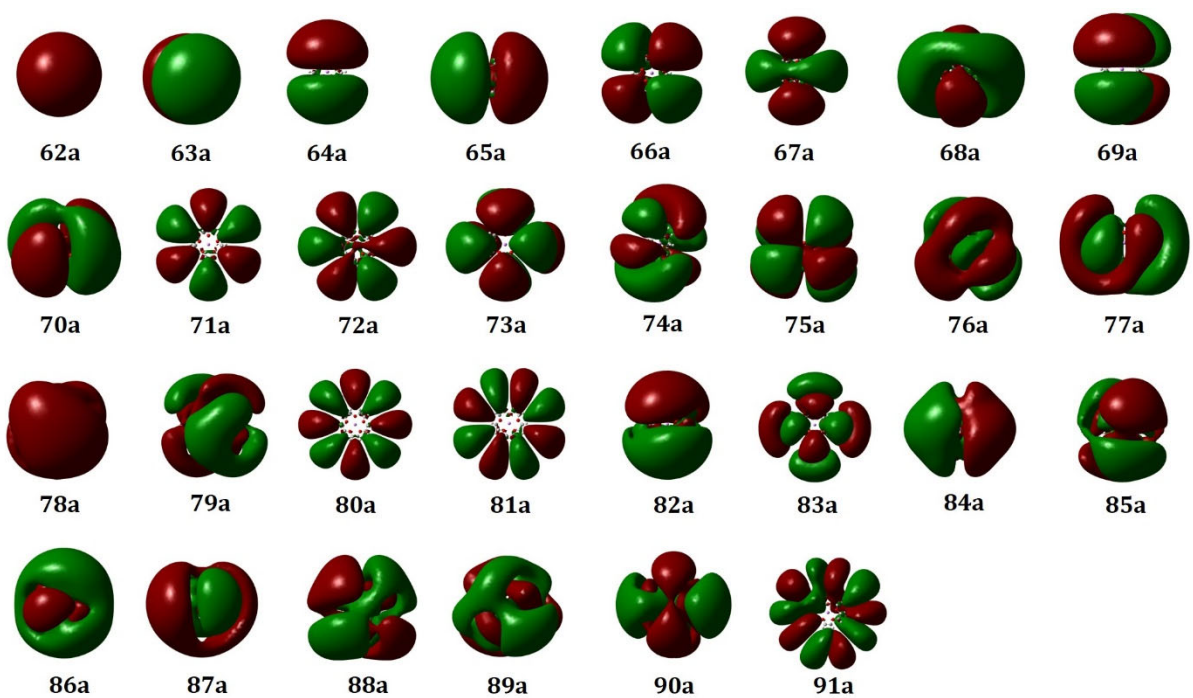

**Figure S6.** Dyson orbitals for vertical electron attachment to  $\text{Li}(15\text{C}5)^+$ .

**Table S17.** Vertical excitation energies (eV) for Na(15C5) at the KT, D2, P3, and P3+ levels of theory.

| Occupied<br>orbital | H: DADZ, Na,C,O: DZ |       |       |       |
|---------------------|---------------------|-------|-------|-------|
|                     | KT                  | D2    | P3    | P3+   |
| 66a                 | 0.000               | 0.000 | 0.000 | 0.000 |
| 67a                 | 0.684               | 0.823 | 0.805 | 0.807 |
| 68a                 | 0.720               | 0.865 | 0.846 | 0.848 |
| 69a                 | 0.770               | 0.936 | 0.916 | 0.918 |
| 70a                 | 0.982               | 1.169 | 1.156 | 1.157 |
| 71a                 | 1.041               | 1.240 | 1.223 | 1.224 |
| 72a                 | 1.046               | 1.252 | 1.234 | 1.236 |
| 73a                 | 1.077               | 1.283 | 1.263 | 1.265 |
| 74a                 | 1.084               | 1.293 | 1.272 | 1.274 |
| 75a                 | 1.301               | 1.518 | 1.510 | 1.511 |
| 76a                 | 1.451               | 1.705 | 1.686 | 1.688 |
| 77a                 | 1.454               | 1.709 | 1.691 | 1.692 |
| 78a                 | 1.477               | 1.726 | 1.712 | 1.714 |
| 79a                 | 1.497               | 1.763 | 1.748 | 1.749 |
| 80a                 | 1.510               | 1.779 | 1.765 | 1.766 |
| 81a                 | 1.533               | 1.797 | 1.783 | 1.784 |
| 82a                 | 1.818               | 2.081 | 2.069 | 2.070 |
| 83a                 | 1.960               | 2.087 | 2.079 | 2.080 |
| 84a                 | 2.012               | 2.137 | 2.128 | 2.129 |
| 85a                 | 1.865               | 2.166 | 2.151 | 2.153 |
| 86a                 | 1.908               | 2.165 | 2.152 | 2.153 |
| 87a                 | 1.874               | 2.167 | 2.153 | 2.154 |
| 88a                 | 2.152               | 2.249 | 2.239 | 2.240 |
| 89a                 | 2.214               | 2.299 | 2.284 | 2.286 |
| 90a                 | 2.249 <sup>a</sup>  | 2.322 | 2.303 | 2.305 |
| 91a                 | 2.275 <sup>a</sup>  | 2.362 | 2.345 | 2.346 |
| 92a                 | 2.172               | 2.405 | 2.392 | 2.393 |
| 93a                 | 2.351 <sup>a</sup>  | 2.450 | 2.432 | 2.434 |
| 94a                 | 2.385 <sup>a</sup>  | 2.471 | 2.454 | 2.455 |
| 95a                 | 2.443 <sup>a</sup>  | 2.565 | 2.550 | 2.551 |

<sup>a</sup> States are not bound at KT.



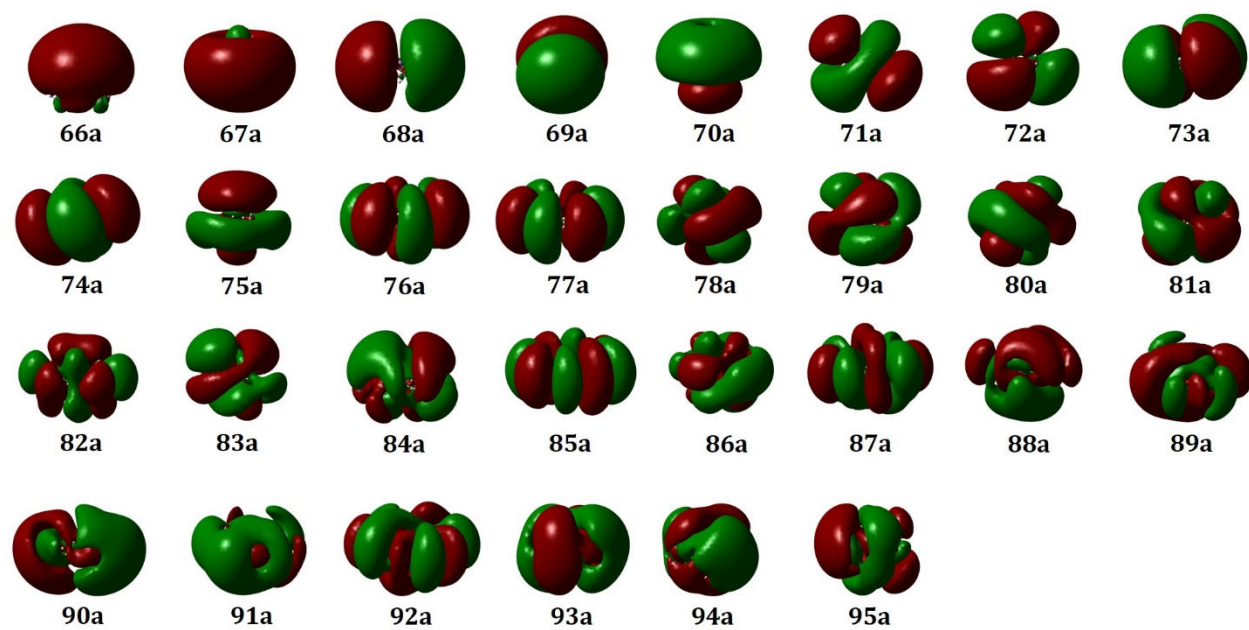

Figure S7. Dyson orbitals for vertical electron attachment to  $\text{Na}(15\text{C}5)^+$ .

**Table S18.** Vertical excitation energies (eV) for K(15C5) at the KT, D2, P3, and P3+ levels of theory.

| Occupied orbital | H: DADZ, K,C,O: DZ |       |       |       |
|------------------|--------------------|-------|-------|-------|
|                  | KT                 | D2    | P3    | P3+   |
| 70a              | 0.000              | 0.000 | 0.000 | 0.000 |
| 71a              | 0.745              | 0.774 | 0.766 | 0.766 |
| 72a              | 0.816              | 0.867 | 0.860 | 0.860 |
| 73a              | 0.899              | 0.936 | 0.926 | 0.926 |
| 74a              | 1.149              | 1.236 | 1.230 | 1.229 |
| 75a              | 1.166              | 1.253 | 1.245 | 1.245 |
| 76a              | 1.175              | 1.264 | 1.256 | 1.255 |
| 77a              | 1.216              | 1.301 | 1.291 | 1.290 |
| 78a              | 1.217              | 1.305 | 1.295 | 1.295 |
| 79a              | 1.438              | 1.519 | 1.521 | 1.520 |
| 80a              | 1.571              | 1.692 | 1.688 | 1.687 |
| 81a              | 1.593              | 1.732 | 1.727 | 1.726 |
| 82a              | 1.600              | 1.739 | 1.733 | 1.732 |
| 83a              | 1.613              | 1.751 | 1.743 | 1.743 |
| 84a              | 1.618              | 1.764 | 1.758 | 1.757 |
| 85a              | 1.641              | 1.780 | 1.775 | 1.774 |
| 86a              | 1.663              | 1.779 | 1.776 | 1.775 |
| 87a              | 1.886              | 1.973 | 1.970 | 1.970 |
| 88a              | 1.938              | 2.040 | 2.038 | 2.038 |
| 89a              | 2.007              | 2.184 | 2.179 | 2.179 |
| 90a              | 2.015              | 2.190 | 2.185 | 2.184 |
| 91a              | 2.083              | 2.190 | 2.186 | 2.185 |
| 92a              | 2.063              | 2.193 | 2.190 | 2.189 |
| 93a              | 2.048              | 2.203 | 2.200 | 2.199 |
| 94a              | 2.150              | 2.216 | 2.211 | 2.210 |
| 95a              | 2.319              | 2.382 | 2.381 | 2.380 |
| 96a              | 2.304              | 2.389 | 2.387 | 2.386 |
| 97a              | 2.365 <sup>a</sup> | 2.437 | 2.436 | 2.435 |
| 98a              | 2.422 <sup>a</sup> | 2.492 | 2.490 | 2.490 |
| 99a              | 2.522 <sup>a</sup> | 2.509 | 2.500 | 2.500 |
| 100a             | 2.544 <sup>a</sup> | 2.554 | 2.547 | 2.547 |

<sup>a</sup> States are not bound at KT

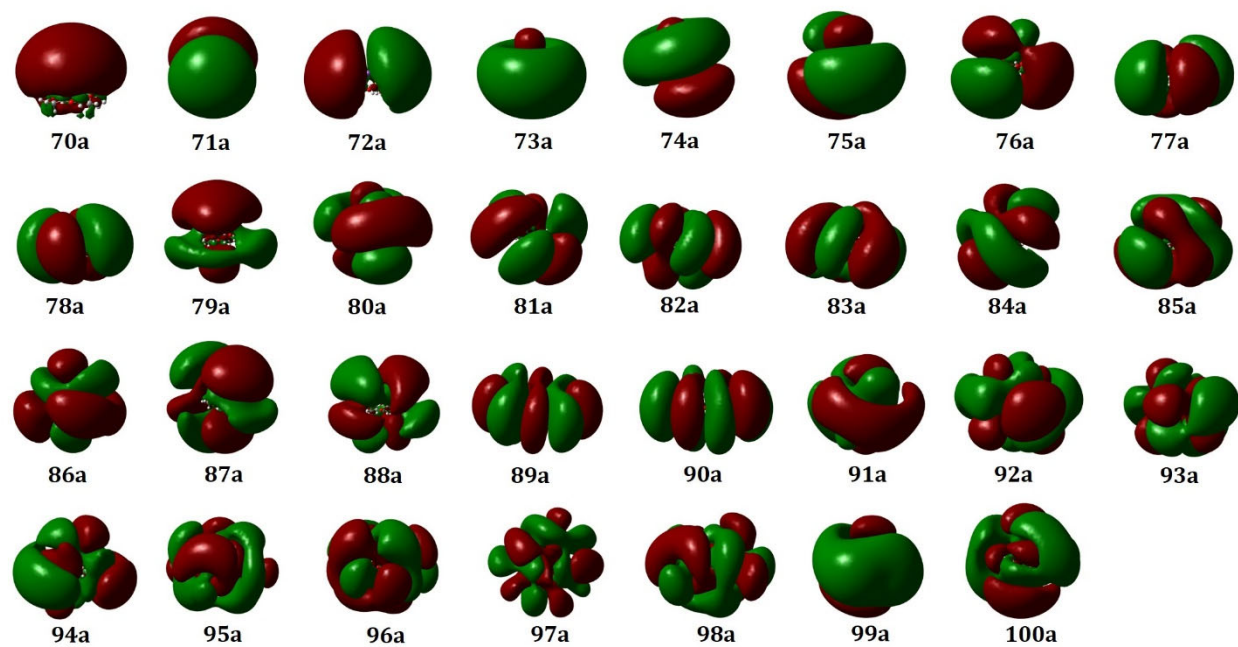

**Figure S8.** Dyson orbitals for vertical electron attachment to  $\text{K}(15\text{C}5)^+$ .

**Table S19.** Vertical excitation energies (eV) for Na(18C6) at the KT, D2, P3, and P3+ levels of theory.

| Occupied orbital               | H: DADZ, Na,C,O: DZ |       |       |       |
|--------------------------------|---------------------|-------|-------|-------|
|                                | KT                  | D2    | P3    | P3+   |
| 19 <sup>2</sup> A <sub>1</sub> | 0.000               | 0.000 | 0.000 | 0.000 |
| 20 <sup>2</sup> A <sub>1</sub> | 0.550               | 0.723 | 0.704 | 0.706 |
| 26 <sup>2</sup> E              | 0.578               | 0.760 | 0.739 | 0.741 |
| 21 <sup>2</sup> A <sub>1</sub> | 0.782               | 0.958 | 0.948 | 0.949 |
| 27 <sup>2</sup> E              | 0.857               | 1.081 | 1.060 | 1.062 |
| 28 <sup>2</sup> E              | 0.866               | 1.094 | 1.076 | 1.077 |
| 22 <sup>2</sup> A <sub>1</sub> | 1.100               | 1.288 | 1.283 | 1.284 |
| 10 <sup>2</sup> A <sub>2</sub> | 1.183               | 1.446 | 1.427 | 1.429 |
| 23 <sup>2</sup> A <sub>1</sub> | 1.198               | 1.462 | 1.443 | 1.445 |
| 29 <sup>2</sup> E              | 1.243               | 1.523 | 1.507 | 1.509 |
| 30 <sup>2</sup> E              | 1.273               | 1.559 | 1.544 | 1.546 |
| 31 <sup>2</sup> E              | 1.564               | 1.871 | 1.854 | 1.856 |
| 24 <sup>2</sup> A <sub>1</sub> | 1.981 <sup>a</sup>  | 1.929 | 1.942 | 1.941 |
| 32 <sup>2</sup> E              | 1.649               | 1.953 | 1.940 | 1.942 |
| 11 <sup>2</sup> A <sub>2</sub> | 1.631               | 1.958 | 1.945 | 1.946 |
| 33 <sup>2</sup> E              | 1.878               | 1.954 | 1.945 | 1.946 |
| 25 <sup>2</sup> A <sub>1</sub> | 2.027 <sup>a</sup>  | 2.053 | 2.042 | 2.043 |
| 34 <sup>2</sup> E              | 2.049 <sup>a</sup>  | 2.155 | 2.135 | 2.137 |
| 26 <sup>2</sup> A <sub>1</sub> | 2.143 <sup>a</sup>  | 2.205 | 2.189 | 2.191 |
| 35 <sup>2</sup> E              | 1.946               | 2.285 | 2.272 | 2.273 |
| 36 <sup>2</sup> E              | 2.192 <sup>a</sup>  | 2.294 | 2.274 | 2.276 |
| 12 <sup>2</sup> A <sub>2</sub> | 1.992 <sup>a</sup>  | 2.297 | 2.284 | 2.285 |

<sup>a</sup> States are not bound at KT.

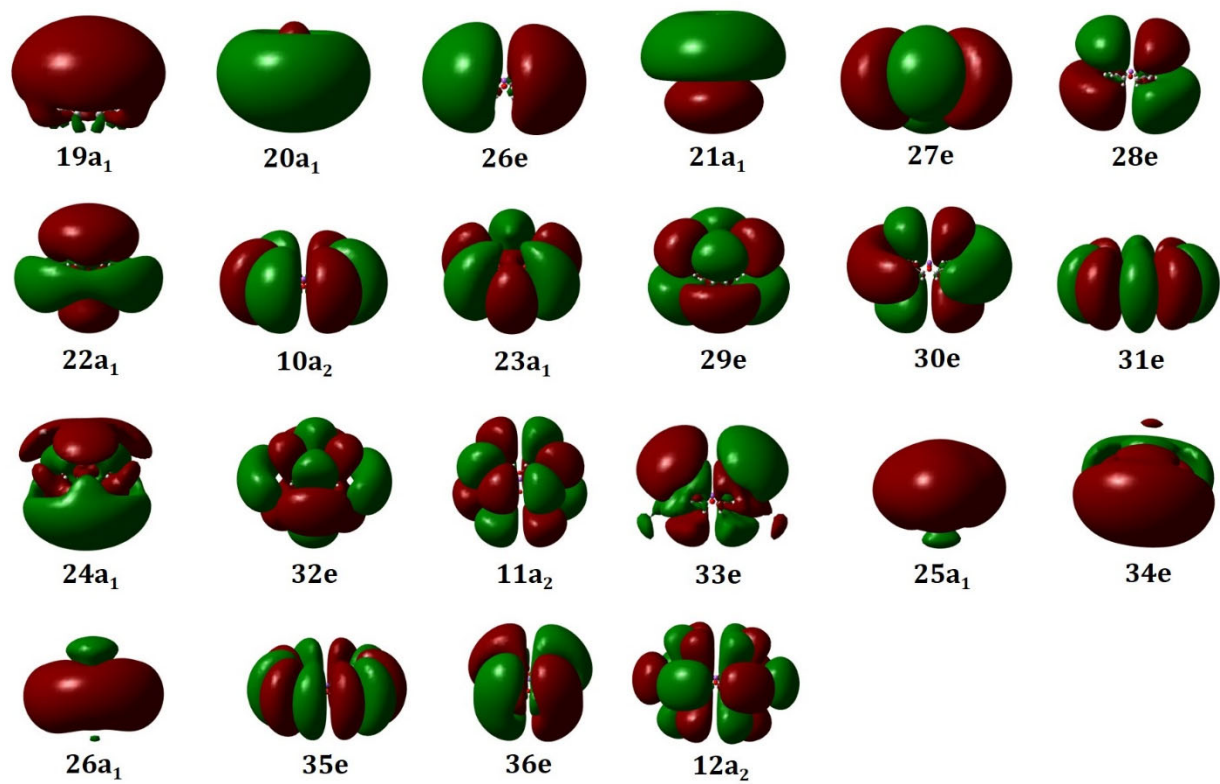

**Figure S9.** Dyson orbitals for vertical electron attachment to  $\text{Na}(18\text{C}6)^+$ .

**Table S20.** Vertical excitation energies (eV) for K(18C6) at the KT, D2, P3, and P3+ levels of theory.

| Occupied orbital               | H: DADZ, K,C,O: DZ |       |       |       |
|--------------------------------|--------------------|-------|-------|-------|
|                                | KT                 | D2    | P3    | P3+   |
| 21 <sup>2</sup> A <sub>1</sub> | 0.000              | 0.000 | 0.000 | 0.000 |
| 27 <sup>2</sup> E              | 0.627              | 0.700 | 0.690 | 0.691 |
| 22 <sup>2</sup> A <sub>1</sub> | 0.677              | 0.761 | 0.750 | 0.751 |
| 23 <sup>2</sup> A <sub>1</sub> | 0.914              | 1.036 | 1.031 | 1.031 |
| 28 <sup>2</sup> E              | 0.935              | 1.060 | 1.051 | 1.051 |
| 29 <sup>2</sup> E              | 0.949              | 1.068 | 1.056 | 1.057 |
| 24 <sup>2</sup> A <sub>1</sub> | 1.235              | 1.367 | 1.366 | 1.366 |
| 10 <sup>2</sup> A <sub>2</sub> | 1.278              | 1.439 | 1.429 | 1.429 |
| 25 <sup>2</sup> A <sub>1</sub> | 1.296              | 1.461 | 1.450 | 1.451 |
| 30 <sup>2</sup> E              | 1.320              | 1.495 | 1.489 | 1.489 |
| 31 <sup>2</sup> E              | 1.337              | 1.510 | 1.504 | 1.504 |
| 26 <sup>2</sup> A <sub>1</sub> | 1.689              | 1.756 | 1.755 | 1.755 |
| 32 <sup>2</sup> E              | 1.703              | 1.795 | 1.793 | 1.793 |
| 33 <sup>2</sup> E              | 1.658              | 1.861 | 1.853 | 1.854 |
| 11 <sup>2</sup> A <sub>2</sub> | 1.711              | 1.933 | 1.928 | 1.928 |
| 34 <sup>2</sup> E              | 1.740              | 1.934 | 1.930 | 1.930 |
| 27 <sup>2</sup> A <sub>1</sub> | 2.118 <sup>a</sup> | 1.978 | 1.994 | 1.993 |
| 35 <sup>2</sup> E              | 1.985              | 2.036 | 2.028 | 2.028 |
| 36 <sup>2</sup> E              | 2.137 <sup>a</sup> | 2.198 | 2.191 | 2.192 |
| 28 <sup>2</sup> A <sub>1</sub> | 2.240 <sup>a</sup> | 2.227 | 2.218 | 2.218 |
| 37 <sup>2</sup> E              | 2.037              | 2.274 | 2.269 | 2.269 |
| 12 <sup>2</sup> A <sub>2</sub> | 2.083 <sup>a</sup> | 2.283 | 2.278 | 2.278 |

<sup>a</sup> States are not bound at KT.

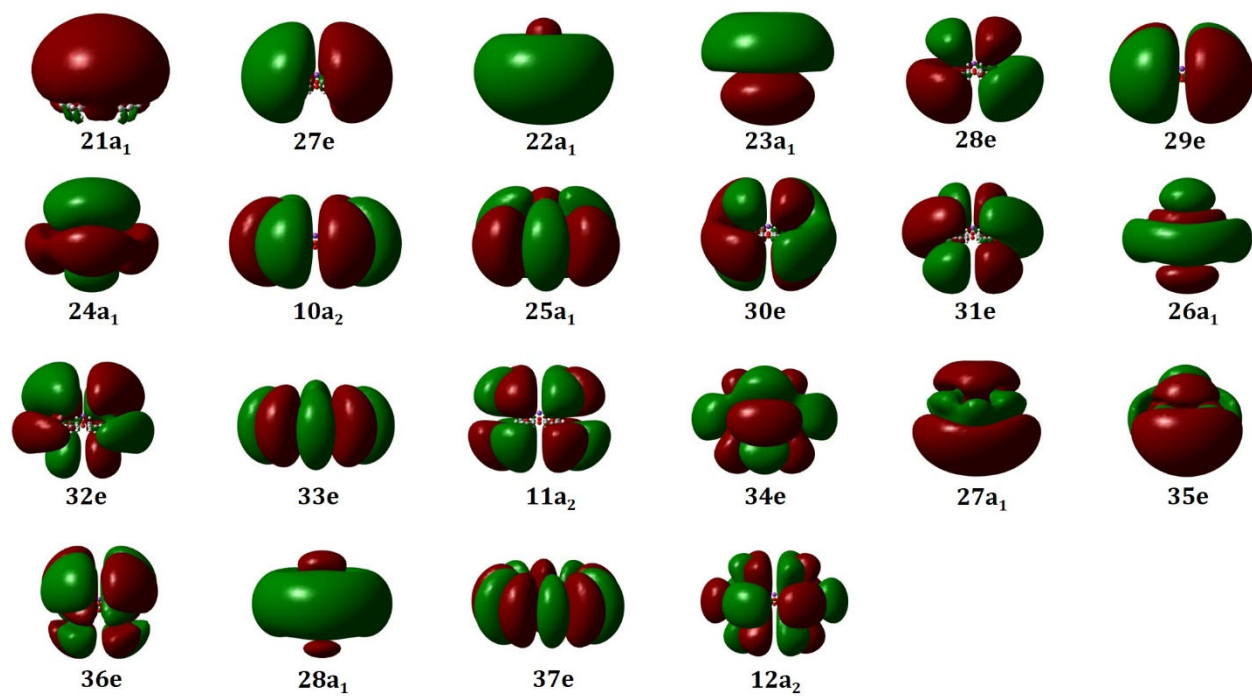

**Figure S10.** Dyson orbitals for vertical electron attachment to  $\text{K}(\text{18C6})^+$ .

**Table S21.** CAM-B3LYP optimized geometries (Cartesian coordinates in Å) for M(12C4)<sub>2</sub> (M = Li, Na, K).

| Li(12C4) <sub>2</sub> |           |           | Na(12C4) <sub>2</sub> |    |           | L-K(12C4) <sub>2</sub> |           |   | S-K(12C4) <sub>2</sub> |           |           |   |           |           |           |
|-----------------------|-----------|-----------|-----------------------|----|-----------|------------------------|-----------|---|------------------------|-----------|-----------|---|-----------|-----------|-----------|
| O                     | 1.951106  | 1.998037  | 0.269331              | O  | -1.674954 | 1.263680               | -0.611101 | O | 0.326633               | 2.531683  | 1.700322  | O | -1.613187 | 0.000000  | 2.992940  |
| O                     | 3.347261  | -0.000264 | -0.669529             | O  | -4.562571 | 1.118070               | -0.328696 | O | 0.248132               | 4.821037  | 0.000000  | O | 0.000000  | 2.202774  | 3.941601  |
| O                     | 1.600043  | 0.000082  | 1.930411              | O  | -1.114520 | -1.321368              | -1.913331 | O | 2.175971               | 1.154136  | 0.000000  | O | -0.000000 | -2.202774 | 3.941601  |
| O                     | 1.950434  | -1.998109 | 0.269761              | O  | -3.210685 | -1.377575              | 0.076441  | O | 0.326633               | 2.531683  | -1.700322 | O | 1.613187  | 0.000000  | 2.992940  |
| C                     | 1.845262  | 2.299745  | 1.657949              | C  | -0.823169 | 1.046790               | -1.720240 | C | 1.411966               | 1.759918  | 2.167859  | C | -2.126777 | -1.184481 | 3.556062  |
| C                     | 3.535467  | 1.222677  | -1.355639             | C  | -3.765383 | 2.191164               | 0.116800  | C | -0.471694              | 4.728718  | 1.206787  | C | -1.208506 | 2.333853  | 3.230238  |
| C                     | 1.014783  | 1.223842  | 2.327837              | C  | -0.171947 | -0.308602              | -1.623488 | C | 1.676535               | 0.629459  | 1.206002  | C | -1.208506 | -2.333853 | 3.230238  |
| C                     | 3.535249  | -1.223502 | -1.355163             | C  | -4.963354 | 0.151634               | 0.618225  | C | -0.471694              | 4.728718  | -1.206787 | C | 1.208506  | 2.333853  | 3.230238  |
| C                     | 1.013979  | -1.223278 | 2.327915              | C  | -1.311674 | -2.352743              | -0.977020 | C | 1.676535               | 0.629459  | -1.206002 | C | 1.208506  | -2.333853 | 3.230238  |
| C                     | 3.207670  | -2.302335 | -0.345683             | C  | -4.616438 | -1.228973              | 0.125582  | C | 0.296599               | 3.865312  | -2.174053 | C | 2.126777  | 1.184481  | 3.556062  |
| C                     | 1.844020  | -2.299710 | 1.658366              | C  | -2.777517 | -2.500110              | -0.659677 | C | 1.411966               | 1.759918  | -2.167859 | C | 2.126777  | -1.184481 | 3.556062  |
| C                     | 3.208220  | 2.301979  | -0.346507             | C  | -2.569150 | 2.349248               | -2.348997 | C | 0.296599               | 3.865312  | 2.174053  | C | -2.126777 | 1.184481  | 3.556062  |
| H                     | 1.389090  | 3.281700  | 1.804894              | H  | -0.050678 | 1.823197               | -1.765115 | H | 1.200247               | 1.356350  | 3.165087  | H | -3.130708 | -1.396315 | 3.166635  |
| H                     | 2.840460  | 2.307238  | 2.105022              | H  | -1.405928 | 1.092699               | -2.644273 | H | 2.309118               | 2.381179  | 2.232986  | H | -2.195489 | -1.082635 | 4.643643  |
| H                     | 2.884389  | 1.269140  | -2.234498             | H  | -3.438452 | 2.037686               | 1.149993  | H | -1.469610              | 4.310986  | 1.040499  | H | 1.026432  | 2.361100  | 2.152118  |
| H                     | 4.571936  | 1.334428  | -1.690096             | H  | -4.344557 | 3.119991               | 0.091869  | H | -0.608158              | 5.721069  | 1.649683  | H | -1.702237 | 3.271569  | 3.506062  |
| H                     | 1.056186  | 1.349024  | 3.413702              | H  | 0.644361  | -0.355104              | -2.348997 | H | 2.402060               | -0.058817 | 1.652295  | H | -1.702237 | -3.271569 | 3.506062  |
| H                     | -0.032322 | 1.260011  | 2.012437              | H  | 0.268015  | -0.440739              | -0.632992 | H | 0.758369               | 0.062338  | 1.029487  | H | -1.026432 | -2.361100 | 2.152118  |
| H                     | 4.571748  | -1.335654 | -1.689424             | H  | -6.046075 | 2.077711               | 0.766531  | H | -0.608158              | 5.721069  | -1.649683 | H | 1.702237  | 3.271569  | 3.506062  |
| H                     | 2.884290  | -1.270108 | -2.234096             | H  | -4.487408 | 0.328356               | 1.587057  | H | -1.469610              | 4.310986  | -1.040499 | H | 1.026432  | -2.361100 | 2.152118  |
| H                     | -0.033033 | -1.258920 | 2.012134              | H  | -0.756711 | -2.157524              | -0.055256 | H | 0.758369               | 0.062338  | -1.029487 | H | -1.026432 | -2.361100 | 2.152118  |
| H                     | 1.054953  | -1.348303 | 3.413809              | H  | -0.942751 | -3.299233              | -1.385094 | H | 2.402060               | -0.058817 | -1.652295 | H | 1.702237  | -3.271569 | 3.506062  |
| H                     | 3.166789  | -3.280290 | -0.830857             | H  | -5.056313 | -1.976615              | 0.795636  | H | -0.172535              | 3.911521  | -3.162933 | H | 3.130708  | 1.396315  | 3.166635  |
| H                     | 3.986341  | -2.321390 | 0.417957              | H  | -5.032225 | -1.371568              | -0.876262 | H | 1.317154               | 4.248336  | -2.255778 | H | 2.195489  | 1.082635  | 4.643643  |
| H                     | 2.839078  | -2.307846 | 2.105729              | H  | -3.339657 | -2.569828              | -1.595490 | H | 2.309118               | 2.381179  | -2.232986 | H | -2.195489 | -1.082635 | 4.643643  |
| H                     | 1.387157  | -3.281357 | 1.805215              | H  | -2.940140 | -3.421586              | -0.088099 | H | 1.200247               | 1.356350  | -3.165087 | H | 3.130708  | -1.396315 | 3.166635  |
| H                     | 3.167261  | 3.279760  | -0.832019             | H  | -2.063183 | 3.296349               | -0.565697 | H | -0.172535              | 3.911521  | 3.162933  | H | -3.130708 | 1.396315  | 3.166635  |
| H                     | 3.987052  | 2.321277  | 0.416958              | H  | -2.912460 | 2.375644               | -1.823240 | H | 1.317154               | 4.248336  | 2.255778  | H | -2.195489 | 1.082635  | 4.643643  |
| Li                    | 1.568663  | 0.000012  | -0.004695             | Na | -1.646504 | -0.084762              | 1.576016  | K | -1.795078              | 1.495600  | 0.000000  | K | 0.000000  | 0.000000  | 0.000000  |
| H                     | -3.691571 | -3.098738 | -0.112412             | H  | 4.216048  | -2.931156              | -0.363825 | H | 0.649261               | -3.988228 | -3.132432 | H | -3.271569 | -1.702237 | -3.506062 |
| H                     | -1.329141 | -3.091545 | -1.369160             | H  | 2.475124  | -3.057848              | 1.800021  | H | -1.682274              | -2.493611 | -3.129832 | H | -3.271569 | 1.702237  | -3.506062 |
| C                     | -3.376312 | -2.084412 | 0.165557              | C  | 3.685618  | -1.977692              | -0.487532 | C | 0.698373               | -3.562723 | -3.121382 | C | -2.333853 | -1.208506 | -3.230238 |
| C                     | -1.284327 | -2.082747 | -0.936509             | C  | 2.179033  | -2.104372              | 1.342461  | C | -1.290537              | -2.264502 | -2.129951 | C | -2.333853 | 1.208506  | -3.230238 |
| H                     | -2.831587 | -2.146812 | 1.114739              | H  | 2.818333  | -2.153996              | -1.133792 | H | 1.247850               | -2.616338 | -2.177450 | H | -2.361100 | -1.026432 | -2.152118 |
| H                     | -0.815397 | -2.170837 | 0.048053              | H  | 1.417290  | -2.324772              | 0.587333  | H | -0.633826              | -1.392314 | -2.225215 | H | -2.361100 | 1.026432  | -2.152118 |
| O                     | -2.562968 | -1.522435 | -0.831651             | O  | 3.277902  | -1.463488              | 0.753119  | O | -0.587188              | -3.354488 | -1.599134 | O | -2.202774 | 0.000000  | -3.941601 |
| C                     | -4.591276 | -1.210790 | 0.348366              | C  | 4.599994  | -0.975778              | -1.146517 | C | 1.436971               | -4.510588 | -1.210081 | H | -1.396315 | -3.130708 | -3.166635 |
| C                     | -0.431769 | -1.223166 | -1.831759             | C  | 1.599275  | -1.209777              | 2.408631  | C | -2.441244              | -1.935274 | -1.214359 | H | -1.396315 | 3.130708  | -3.166635 |
| H                     | -5.321244 | -1.739999 | 0.968006              | H  | 5.090986  | -1.446027              | -2.004531 | H | 2.353256               | -4.847011 | -1.705515 | C | -1.184481 | -2.126777 | -3.556062 |
| H                     | 0.467338  | -1.777263 | -2.101532             | H  | 0.857758  | -1.765020              | 2.990120  | H | -3.109864              | -1.224158 | -1.708334 | C | -1.184481 | 2.126777  | -3.556062 |
| H                     | -5.044090 | -1.023123 | -0.627463             | H  | 5.370605  | -0.678497              | -0.432002 | H | 0.807999               | -5.384010 | -1.024852 | H | -1.082635 | -2.195489 | -4.643643 |
| H                     | -0.982287 | -0.998344 | -2.743647             | H  | 2.396689  | -0.898169              | 3.083579  | H | -3.004452              | -2.845987 | -1.009432 | H | -1.082635 | 2.195489  | -4.643643 |
| O                     | -4.237971 | 0.000640  | 0.978045              | O  | 3.861226  | 0.145446               | -1.577891 | O | 1.762302               | -3.863946 | -0.000000 | O | -0.000000 | -1.613187 | -2.992940 |
| O                     | -0.033501 | -0.000545 | -1.200620             | O  | 0.977648  | -0.071246              | 1.828983  | O | -1.968586              | -1.368473 | -0.000000 | O | 0.000000  | 1.613187  | -2.992940 |
| C                     | -4.590746 | 1.211866  | 0.347668              | C  | 4.339891  | 1.427359               | -1.237002 | C | 1.436971               | -4.510588 | 1.210081  | C | 1.184481  | -2.126777 | -3.556062 |
| C                     | -0.431126 | 1.222349  | -1.831766             | C  | 1.363479  | 1.203909               | 2.328294  | C | -2.441244              | -1.935274 | 1.214359  | C | 1.184481  | 2.126777  | -3.556062 |
| H                     | -5.043003 | 1.023860  | -0.628353             | H  | 5.157684  | 1.354972               | -0.516765 | H | 0.807999               | -5.384010 | 1.024852  | H | 1.082635  | -2.195489 | -4.643643 |
| H                     | -0.981989 | 0.997791  | -2.743508             | H  | 2.227808  | 1.102412               | 2.984783  | H | -3.004452              | -2.845987 | 1.009432  | H | 1.082635  | 2.195489  | -4.643643 |
| H                     | -5.320968 | 1.741481  | 0.966663              | H  | 4.715950  | 1.931496               | -2.132977 | H | 2.353256               | -4.847011 | 1.705515  | O | 2.202774  | -0.000000 | -3.941601 |
| H                     | 0.468270  | 1.775851  | -2.101750             | H  | 0.537268  | 1.624627               | 2.909425  | H | -3.109864              | -1.224158 | 1.708334  | H | 1.396315  | -3.130708 | -3.166635 |
| O                     | -2.562105 | 1.522695  | -0.831835             | O  | 2.932077  | 1.725401               | 0.634737  | O | -0.587188              | -3.354488 | 1.599134  | H | 1.396315  | 3.130708  | -3.166635 |
| C                     | -3.375467 | 2.085107  | 0.165102              | C  | 3.229140  | 2.248452               | -0.631527 | C | 0.698373               | -3.562723 | 2.121382  | C | 2.333853  | -1.208506 | -3.230238 |
| C                     | -1.283155 | 2.082371  | -0.936453             | C  | 1.711880  | 2.133354               | 1.195666  | C | -1.290537              | -2.264502 | 2.129951  | C | 2.333853  | 1.208506  | -3.230238 |
| H                     | -2.830968 | 2.147409  | 1.114421              | H  | 2.350137  | 2.201413               | -1.283888 | H | 1.247850               | -2.616338 | 2.177450  | H | 2.361100  | -1.026432 | -2.152118 |
| H                     | -0.814297 | 2.170048  | 0.048168              | H  | 0.913993  | 2.111853               | 0.446106  | H | -0.633826              | -1.392314 | 2.225215  | H | 2.361100  | 1.026432  | -2.152118 |
| H                     | -3.690284 | 3.099510  | -0.113071             | H  | 3.543842  | 3.298412               | -0.562982 | H | 0.649261               | -3.988228 | 3.132432  | H | 3.271569  | -1.702237 | -3.506062 |
| H                     | -1.327379 | 3.091257  | -1.368951             | H  | 1.779128  | 3.158725               | 1.582862  | H | -1.682274              | -2.493611 | 3.129832  | H | 3.271569  | 1.702237  | -3.506062 |



**Table S22.** Vertical excitation energies (eV) for S-K(12C4)<sub>2</sub> at the KT, D2, P3, and P3+ levels of theory.

| Occupied orbital | Excitation energy (eV) |       |       |       |
|------------------|------------------------|-------|-------|-------|
|                  | KT                     | D2    | P3    | P3+   |
| 1a <sub>1</sub>  | 0.000                  | 0.000 | 0.000 | 0.000 |
| 1e               | 0.402                  | 0.654 | 0.633 | 0.635 |
| 2a <sub>1</sub>  | 0.731                  | 1.066 | 1.055 | 1.057 |
| 1b <sub>2</sub>  | 0.783                  | 1.168 | 1.146 | 1.148 |
| 1b <sub>1</sub>  | 0.779                  | 1.169 | 1.147 | 1.149 |
| 2b <sub>2</sub>  | 0.881                  | 1.323 | 1.303 | 1.305 |
| 2e               | 0.996                  | 1.450 | 1.429 | 1.431 |
| 3e               | 1.081                  | 1.445 | 1.431 | 1.433 |
| 3a <sub>1</sub>  | 1.094                  | 1.534 | 1.523 | 1.524 |
| 1a <sub>2</sub>  | 1.247                  | 1.736 | 1.717 | 1.718 |
| 4e               | 1.243                  | 1.744 | 1.725 | 1.727 |
| 4a <sub>1</sub>  | 1.286                  | 1.770 | 1.751 | 1.752 |
| 3b <sub>2</sub>  | 1.325                  | 1.809 | 1.794 | 1.795 |
| 5e               | 1.406                  | 1.857 | 1.845 | 1.846 |
